# Supplementary material for: International Committee on Mental Health in Cystic Fibrosis: Cystic Fibrosis Foundation and European Cystic Fibrosis Society consensus statements for screening and treating depression and anxiety
Source: HighWire-hosted journal article supplement (doi:10.1136/thoraxjnl-2015-207488), 2015-10-09
Supplement: thoraxjnl-2015-207488supp_appendixA.pdf [file thoraxjnl-2015-207488supp_appendixA.pdf]

**Table 1. Prevalence of depression and anxiety in patients and parent caregivers across chronic conditions**

| Journal (Authors)                                                        | Population                 | Sample Size            | Measures                                            | Depression Rate                                   | Anxiety Rate                                    | Location         | Review | Matched Healthy           | Notes                                                                                                                                                                          |
|--------------------------------------------------------------------------|----------------------------|------------------------|-----------------------------------------------------|---------------------------------------------------|-------------------------------------------------|------------------|--------|---------------------------|--------------------------------------------------------------------------------------------------------------------------------------------------------------------------------|
| <b>Psychological Medicine (Goodwin et al., 2004)<sup>1</sup></b>         | Asthma<br>Children & Teens | N= 183,<br>16-18 years | CIDI (Composite International Diagnostic Interview) | 33.90%                                            | 23.00%                                          | New Zealand      | No     | Yes                       |                                                                                                                                                                                |
| <b>Journal of Asthma (Goodwin et al., 2005)<sup>2</sup></b>              | Asthma<br>Children & Teens | N= 74<br>5-11 years    | DISC Predictive Scales                              | 2.70%                                             | 4.10%                                           | New York         | No     | No                        |                                                                                                                                                                                |
| <b>Adolescent Health (Katon et al., 2007)<sup>3</sup></b>                | Asthma<br>Children & Teens | N= 781<br>11-17 years  | DISC, ASI                                           | 7.2% vs. 4.0%                                     | 2.20%                                           | Washington State | No     | Yes, controls             |                                                                                                                                                                                |
| <b>General Hospital Psychiatry (Richardson et al., 2008)<sup>4</sup></b> | Asthma<br>Children & Teens | N= 767<br>11-14 years  | Interview, DISC, PCDS                               | 2.5% met criteria for a depressive disorder alone | 8.9% met criteria for an anxiety disorder alone | Washington State | No     | Yes for health care costs | 16.2% of youth with asthma met DSMIV criteria for >1 anxiety or depressive disorders in the last 12 months and 4.8% met criteria for both an anxiety and a depressive disorder |

| Journal (Authors)                                                         | Population                                    | Sample Size                                 | Measures                     | Depression Rate | Anxiety Rate | Location         | Review | Matched Healthy | Notes                                                                                 |
|---------------------------------------------------------------------------|-----------------------------------------------|---------------------------------------------|------------------------------|-----------------|--------------|------------------|--------|-----------------|---------------------------------------------------------------------------------------|
| <b>European Journal of Cancer (Allen et al., 1997)<sup>5</sup></b>        | Cancer<br>Children & Teens                    | N= 42 12-20 years vs N= 173 controls        | BDI, STAI                    | 38% vs 29%      | 9% vs. 15%   | U.K.             | No     | Yes             |                                                                                       |
| <b>Acta Pñdiatr (Von Essen et al., 2000)<sup>6</sup></b>                  | Cancer<br>Children & Teens                    | N= 51<br>8-18 years                         | CDI, RCMAS                   | 14%             | N/A          | Sweden           | No     | Yes             | Children and adolescents on treatment did not differ from their healthy Swedish peers |
| <b>J Pediatr Hematol Oncol (Hedstrom et al., 2005)<sup>7</sup></b>        | Cancer<br>Children & Teens                    | N= 56<br>13-19 years                        | HADS, Interview, SF-36       | 21%             | 12%          | Sweden           | No     | No              |                                                                                       |
| <b>International Council of Nurses (Matziou et al., 2008)<sup>8</sup></b> | Cancer<br>Children & Teens                    | N= 80 cancer<br>6-17 years<br>N= 84 control | CDI                          | 7.5% vs. 11.9%  | N/A          | Greece           | No     | Yes             |                                                                                       |
| <b>J Pediatr Hematol Oncol (Kersun et al., 2009)<sup>9</sup></b>          | Cancer<br>Children & Teens                    | N=41<br>12-18 years                         | BYI (Beck Youth Inventory)   | 17.10%          | 21.9         | US               | No     | No              |                                                                                       |
| <b>Pediatric Blood &amp; Cancer (Deyell et al., 2013)<sup>10</sup></b>    | Cancer<br>Children, Adolescents, Young Adults | N= 2,389<br>Mean age= 28.8                  | Anti-depressant Prescription | 21.6%           | NA           | British Colombia | No     | Yes             |                                                                                       |

| Journal (Authors)                                                 | Population                            | Sample Size              | Measures   | Depression Rate                                                                                 | Anxiety Rate                                                                                  | Location      | Review | Matched Healthy | Notes                     |
|-------------------------------------------------------------------|---------------------------------------|--------------------------|------------|-------------------------------------------------------------------------------------------------|-----------------------------------------------------------------------------------------------|---------------|--------|-----------------|---------------------------|
| <b>Journal of Advanced Nursing (Wu et al., 2013)<sup>11</sup></b> | Cancer, Adolescents                   | N= 131<br>Mean age+ 14.7 | RCMAS      | NA                                                                                              | 11.5%                                                                                         | Taiwan        | No     | No              |                           |
| <b>Cancer (Myers et al., 2013)<sup>12</sup></b>                   | Acute Lymphoblastic Leukemia Children | N= 159<br>Mean age= 4.9  | BASC-2 PRS | 5 % 1 month post-diagnosis<br>6.4% % 6 months post-diagnosis<br>6.8% % 12 months post-diagnosis | 10.4% 1 month post-diagnosis<br>8.7% 6 months post-diagnosis<br>4.5% 12 months post-diagnosis | United States | No     | Yes             |                           |
| <b>Children's Healthcare (Key et al., 2001)<sup>13</sup></b>      | Chronic Illness<br>Children & Teens   | N= 125<br>13-18 years    | BDI        | Total 13.4%<br>CF= 7.1% vs. 5%                                                                  | N/A                                                                                           | US            | No     | Yes             | NO differences, low power |
| <b>Psychosomatic Research (Grey et al., 2002)<sup>14</sup></b>    | Diabetes<br>Children & Teens          |                          |            | 20% vs. 7%                                                                                      | N/A                                                                                           | US            | Yes    | Yes             |                           |
| <b>Pediatrics (Lawrence et al., 2006)<sup>15</sup></b>            | Diabetes<br>Children & Teens          | N= 2,672<br>10-21 years  | CES-D      | 22%                                                                                             | N/A                                                                                           | US            | No     | Yes             |                           |

| Journal (Authors)                                                         | Population                              | Sample Size                                   | Measures                                                                                                        | Depression Rate                          | Anxiety Rate | Location | Review | Matched Healthy | Notes |
|---------------------------------------------------------------------------|-----------------------------------------|-----------------------------------------------|-----------------------------------------------------------------------------------------------------------------|------------------------------------------|--------------|----------|--------|-----------------|-------|
| <b>Diabetes Care (Hood et al., 2006)<sup>16</sup></b>                     | Diabetes<br>Children & Teens            | N= 145<br>10-18 years                         | CDI, Family Conflict Scale, Diabetes Family Responsibility Questionnaire , Blood Glucose Monitoring Comm. Ques. | 15.20%                                   | N/A          | US       | No     | No              |       |
| <b>Pediatric Diabetes (Colton et al., 2013)<sup>17</sup></b>              | Diabetes<br>Children & Teens<br>(Girls) | N=98, 9-14 year at baseline, 14-18 5 yr later | K-SADS interview                                                                                                | 30% (at year 5, longitudinal design)     | N/A          | U.S.     | No     | No              |       |
| <b>Clinical Pediatrics (Bernstein et al., 2013)<sup>18</sup></b>          | Children and young adults               | N=150, M=17                                   | BDI, SCARED                                                                                                     | 11.3%                                    | 21.3%        | U.S.     | No     | No              |       |
| <b>Current Diabetes Reports (Pinhas-Hamiel et al., 2013)<sup>19</sup></b> | Diabetes<br>Children older than 10      | N/A                                           | N/A                                                                                                             | 18% vs 5% in boys,<br>20% vs 9% in girls | N/A          | U.S.     | Yes    | Yes             |       |

| Journal (Authors)                                                          | Population                                                        | Sample Size                                                        | Measures                                                       | Depression Rate                 | Anxiety Rate | Location | Review | Matched Healthy | Notes |
|----------------------------------------------------------------------------|-------------------------------------------------------------------|--------------------------------------------------------------------|----------------------------------------------------------------|---------------------------------|--------------|----------|--------|-----------------|-------|
| <b>Journal of Child Neurology</b><br>(Banihani et al., 2015) <sup>20</sup> | Duchenne muscular dystrophy<br><br>Children & Teens<br><br>(Boys) | N=59                                                               | Diagnostic and Statistical Manual of Mental Disorders criteria | N/A                             | 27%          | US       | No     | No              |       |
| <b>Child Neurology</b><br>(Oguz et al., 2002) <sup>21</sup>                | Epilepsy<br><br>Children & Teens                                  | N= 35<br>7-18 Years<br>N= 35 controls<br>7-18 years                | STAI, CDI                                                      | 28% vs. 8%                      | N/A          | Turkey   | No     | Yes             |       |
| <b>Epilepsy &amp; Behavior</b><br>(Baki et al., 2004) <sup>22</sup>        | Epilepsy<br><br>Children & Teens                                  | N= 35 w/<br>Epilepsy<br>7-19 Years<br>N= 35 controls<br>8-17 years | CDI, STAI, BDI, STAI                                           | 12% vs. 9%                      | 51-49%       | Turkey   | No     | Yes             |       |
| <b>Epilepsia</b><br>(Caplan et al., 2005) <sup>23</sup>                    | Epilepsy<br><br>Children & Teens                                  | N= 171<br>5-16 years                                               | K-SADS, CDI                                                    | 33% affective and anxiety vs 6% | Combined     | US       | No     | Controls        |       |
| <b>Seizure</b><br>(Reilly et al., 2011) <sup>24</sup>                      | Epilepsy<br><br>Children & Teens                                  |                                                                    |                                                                | 12-14%                          | N/A          | USA/UK   | Yes    | No              |       |

| Journal (Authors)                                                                 | Population       | Sample Size                  | Measures                                                                        | Depression Rate                                              | Anxiety Rate                                                                  | Location    | Review | Matched Healthy | Notes |
|-----------------------------------------------------------------------------------|------------------|------------------------------|---------------------------------------------------------------------------------|--------------------------------------------------------------|-------------------------------------------------------------------------------|-------------|--------|-----------------|-------|
| <b>Psychological Medicine</b><br><b>(Goodwin et al., 2004)<sup>1</sup></b>        | Asthma<br>Adults | N= 203<br>18-21 years        | CIDI                                                                            | 31.00%                                                       | 19.20%                                                                        | New Zealand | No     | Yes             |       |
| <b>PLOS ONE</b><br><b>(Liu et al., 2014)<sup>25</sup></b>                         | Asthma<br>Adults | N= 261,<br>18-79 years       | SAS (Self Rating<br>Anxiety Scale),<br>SDS (Self Rating<br>Depression<br>Scale) | 13.41%                                                       | 11.88%                                                                        | China       | No     | No              |       |
| <b>Cancer</b><br><b>(Kugaya et al., 2000)<sup>26</sup></b>                        | Cancer<br>Adults | N=107<br>Mean age =<br>61    | HADS                                                                            | 15.9% with<br>history of<br>MDD; 3.7%<br>with current<br>MDD | 13.1%<br>(4.7%<br>anxiety only<br>+ 8.4%<br>anxiety and<br>depressed<br>mood) | Japan       | No     | No              |       |
| <b>Psychosomatics</b><br><b>(Brintzenhofe-Szoc et al.,<br/>2009)<sup>27</sup></b> | Cancer<br>Adults | N= 8,175<br>Mean age=<br>54  | BSI                                                                             | 18.30%                                                       | 24.00%                                                                        | US (JHU)    | No     | No              |       |
| <b>Affective Disorders</b><br><b>(Linden et al., 2012)<sup>28</sup></b>           | Cancer<br>Adults | N= 10,153<br>Mean age=<br>59 | PSSCAN                                                                          | 12.90%                                                       | 19%                                                                           | Canada      | No     | No              |       |

| Journal (Authors)                                                               | Population                 | Sample Size                                                                      | Measures                                                                                       | Depression Rate                                                                                                                                                                                                           | Anxiety Rate                                                     | Location      | Review | Matched Healthy | Notes |
|---------------------------------------------------------------------------------|----------------------------|----------------------------------------------------------------------------------|------------------------------------------------------------------------------------------------|---------------------------------------------------------------------------------------------------------------------------------------------------------------------------------------------------------------------------|------------------------------------------------------------------|---------------|--------|-----------------|-------|
| <b>The Lancet Oncology</b><br><b>(Mitchell et al., 2013)<sup>29</sup></b>       | Cancer Survivors<br>Adults | N= 51, 381 with depression<br>N= 48, 964 with anxiety<br>Mean age range= 50-73.9 | CES-D, HADS-D, HADS-A, CIDI, DSM-IV diagnosis, ICD-9-CM diagnosis, consultation, prescription, | RR of depression in cancer survivors vs. controls:<br><b>CES-D: 1.86 (p&lt;.05)</b><br>HADS: 0.93 (p=0.56)<br>Overall prevalence (both measures): 11.6% in cancer survivors to 10.2% in health controls (RR=1.11, p=0.17) | 17.9% in cancer survivors vs. 13.9% in controls (RR=1.27, p<.01) | International | Yes    | Yes             |       |
| <b>Psycho- Oncology</b><br><b>(Carlson et al., 2011)<sup>30</sup></b>           | Cancer Adults              | N= 877<br>Mean age=62.3                                                          | PSSCAN                                                                                         | 10.7%                                                                                                                                                                                                                     | 25.9%                                                            | Canada        | No     | No              |       |
| <b>Support Care Cancer</b><br><b>(Hong &amp; Tian, 2013)<sup>31</sup></b>       | Cancer Adults              | N= 1,217<br>Mean age= 51.24                                                      | HADS                                                                                           | 66.72%                                                                                                                                                                                                                    | 6.49%                                                            | China         | No     | No              |       |
| <b>Journal of Clinical Oncology</b><br><b>(Boyes et al., 2013)<sup>32</sup></b> | Cancer Survivors<br>Adults | N= 1,154<br>Ages 18-80                                                           | HADS                                                                                           | 13% (6mo and 12mo post-dx)                                                                                                                                                                                                | 22% (6mo post-dx)/21% (12mo post-dx)                             | Australia     | No     | No              |       |

| Journal (Authors)                                                          | Population                                                | Sample Size                        | Measures                                                         | Depression Rate                          | Anxiety Rate                             | Location      | Review | Matched Healthy | Notes |
|----------------------------------------------------------------------------|-----------------------------------------------------------|------------------------------------|------------------------------------------------------------------|------------------------------------------|------------------------------------------|---------------|--------|-----------------|-------|
| <b>Annals of Oncology</b><br><b>(Walker et al., 2013)<sup>33</sup></b>     | Cancer<br>Adults                                          | N= 100-3938<br>Ages 18 and older   | DSM-IV/ICD criteria based on clinical interview                  | 4-11%                                    | NA                                       | International | Yes    | No              |       |
| <b>Psycho-Oncology</b><br><b>(Stafford et al., 2013)<sup>34</sup></b>      | Breast and Gynaecologic Cancer<br>Adults                  | N= 167<br>Ages 18 and older        | CES-D, HADS-A                                                    | 7.5                                      | 23.4                                     | Australia     | No     | No              |       |
| <b>Psycho-Oncology</b><br><b>(Krebber et al., 2014)<sup>35</sup></b>       | Cancer<br>Adults                                          | N= 238 cohorts<br>Age not included | HADS-D, CES-D, Diagnostic Interviews based on DSM-III(-R)/ICD-10 | 8-24%                                    | NA                                       | International | Yes    | No              |       |
| <b>Psycho-Oncology</b><br><b>(Singer et al, 2013)<sup>36</sup></b>         | Cancer<br>Adults                                          | N= 502<br>Mean age= 57.63          | SCID                                                             | 7.6%                                     | 8.4%                                     | Germany       | No     | Yes             |       |
| <b>Support Care Cancer</b><br><b>(Mackenzie et al., 2013)<sup>37</sup></b> | Cancer, undergoing radiation<br>Adults                    | N= 454<br>Mean age= 61.2           | HADS-3, HADS-A, HADS-T                                           | 5.7%                                     | 15%                                      | Australia     | No     | No              |       |
| <b>Psycho-Oncology</b><br><b>(Neilson et al., 2013)<sup>38</sup></b>       | Head and Neck Cancer, treated with radiotherapy<br>Adults | N= 101<br>Mean age= 63             | HADS                                                             | 15% baseline, 29% 3 weeks post-treatment | 20% baseline, 17% 3 weeks post-treatment | Australia     | No     | No              |       |

| Journal (Authors)                                                      | Population                                    | Sample Size                        | Measures                                                                                                                                                                                                               | Depression Rate                                                      | Anxiety Rate                                                         | Location      | Review | Matched Healthy | Notes |
|------------------------------------------------------------------------|-----------------------------------------------|------------------------------------|------------------------------------------------------------------------------------------------------------------------------------------------------------------------------------------------------------------------|----------------------------------------------------------------------|----------------------------------------------------------------------|---------------|--------|-----------------|-------|
| <b>British Journal of Cancer (Brinkman, et al., 2013)<sup>39</sup></b> | Cancer<br>Adult Survivors of Childhood Cancer | N= 4569<br>Mean age= 27            | BSI-18                                                                                                                                                                                                                 | 8.9%                                                                 | 4.8%                                                                 | United States | No     | No              |       |
| <b>BMJ Open (Watts et al., 2014)<sup>40</sup></b>                      | Prostate Cancer<br>Adult                      | N= 4494<br>Mean age= 66.3          | HADS, STAS, CESD, Symptom Checklist, BDI, Self-Rating Anxiety Scale, Self-Rating Depression Scale, BSI, CIDI, Memorial Anxiety Scale for Prostate Cancer and the Effects of Prostate Cancer on Lifestyle Questionnaire | 17.24% pre-treatment<br>14.70% on-treatment<br>14.70% post-treatment | 27.04% pre-treatment<br>15.09% on-treatment<br>18.49% post-treatment | International | Yes    | No              |       |
| <b>BMC Cancer (Yang et al., 2013)<sup>41</sup></b>                     | Cancer<br>Adults                              | N= 3497<br>Mean age range= 35.3-67 | DSM-IV or CCMD diagnosis, HRSD/HRSA, other self-report questionnaires                                                                                                                                                  | 54.90%                                                               | 49.69%                                                               | China         | Yes    | Yes             |       |

| Journal (Authors)                                                    | Population                                                                     | Sample Size                     | Measures                                 | Depression Rate                                            | Anxiety Rate | Location                                                                                              | Review | Matched Healthy          | Notes |
|----------------------------------------------------------------------|--------------------------------------------------------------------------------|---------------------------------|------------------------------------------|------------------------------------------------------------|--------------|-------------------------------------------------------------------------------------------------------|--------|--------------------------|-------|
| <b>The Lancet, Psychiatry (Walker et al., 2014)<sup>42</sup></b>     | Lung, gynecological, breast, colorectal, or genitourinary cancer<br><br>Adults | N= 21,151<br>Mean age= 64.4     | HADS, SCID                               | 4.5-13.1%                                                  | NA           | Scotland                                                                                              | No     | No                       |       |
| <b>Respiratory Care (Willgoss &amp; Yohannes, 2013)<sup>43</sup></b> | COPD                                                                           | Study N=20-204<br>(Total N=691) | ND, CIDI, SCID, ADIS-IV, F-DIPS, or GMSS | N/A                                                        | 10-55%       | 8 countries (Nigeria, Turkey, New Zealand, United States, Germany, Canada, Australia, United Kingdom) | Yes    |                          |       |
| <b>Diabetes Care (Anderson et al., 2001)<sup>44</sup></b>            | Diabetes Adults                                                                |                                 |                                          | Twice as common in Diabetes group than in Comparison group | N/A          | US                                                                                                    | Yes    | Yes, half of studies did |       |
| <b>Diabetes Care (Li, et al. 2008)<sup>45</sup></b>                  | Type 1/2 Diabetes Adults                                                       | N=18,814<br>Mean age = 62       | PHQ-8                                    | 16.6% (8.3% major depression, 8.3% minor depression)       | N/A          | US (data from 2006 Behavior Risk Factor Surveillance Survey, BRFSS)                                   | No     | No                       |       |

| Journal (Authors)                                                                        | Population                | Sample Size        | Measures       | Depression Rate                              | Anxiety Rate | Location        | Review | Matched Healthy | Notes                                                                                                                                                                                      |
|------------------------------------------------------------------------------------------|---------------------------|--------------------|----------------|----------------------------------------------|--------------|-----------------|--------|-----------------|--------------------------------------------------------------------------------------------------------------------------------------------------------------------------------------------|
| <b>Diabetic Medicine (Ali et al., 2006)<sup>46</sup></b>                                 | Type 2 Diabetes Adults    | Meta-analysis      |                | 17.6% (diabetes) vs. 9.8% (healthy controls) | N/A          | Various         | Yes    | Yes             | Odds ratio for having depression given T2D status = 1.6                                                                                                                                    |
| <b>Diabetic Medicine (Barnard et al., 2005)<sup>47</sup></b>                             | Diabetes Adults           | Review             |                | 12% vs. 3.2%                                 | N/A          |                 | Yes    | Yes             |                                                                                                                                                                                            |
| <b>Journal of Intellectual Disability Research (De Winter et al., 2015)<sup>48</sup></b> | Diabetes Adults & Elderly | N= 2322<br>M= 61.1 | IDS-SR; SDL-ID | 16.8                                         | 16.3         | The Netherlands | No     | Yes             | There was a significant association between increased anxiety symptoms and diabetes.                                                                                                       |
| <b>Psychosomatics (Smith &amp; Schmitz, 2014)<sup>49</sup></b>                           | Diabetes Adults           | N=1701             | WHO DAS II     | 2.4                                          | 5.8          | The Netherlands | No     | No              | Results indicate that elevated anxiety and depression symptoms are important factors associated with increased functional disability and frequent disability days in people with diabetes. |

| Journal (Authors)                                                                  | Population                                        | Sample Size                        | Measures       | Depression Rate                                         | Anxiety Rate | Location | Review | Matched Healthy | Notes |
|------------------------------------------------------------------------------------|---------------------------------------------------|------------------------------------|----------------|---------------------------------------------------------|--------------|----------|--------|-----------------|-------|
| <b>Journal of Psychosomatic Research</b><br>(Deschenes et al., 2015) <sup>50</sup> | Diabetes<br>Adults                                | N= 1730<br>30-79                   | WMH-CIDI       |                                                         |              | Canada   | No     | No              |       |
| <b>Journal of Psychosomatic Research</b><br>(Mezuk et al., 2013) <sup>51</sup>     | Diabetes<br>Adults                                | N= 512,891<br>30-79                | CIDI-SF        | .9 vs .6                                                | .3 vs .2     | China    | No     | Yes             |       |
| <b>Journal of Affective Disorders</b><br>(Tanenbaum et al., 2013) <sup>52</sup>    | Diabetes<br>Adults                                | N=70<br>Mean<br>age=56             | CES-D, DDS     | ?                                                       | ?            |          |        |                 |       |
| <b>BMC Psychiatry</b><br>(Niraula et al., 2013) <sup>53</sup>                      | Diabetes<br>Adults                                | N=348<br>Mean<br>age=52            | BDI-I          | 40.3% of the<br>population                              | N/A          | Nepal    | No     | No              |       |
| <b>Journal of Affective Disorders</b><br>(Windle & Windle, 2013) <sup>54</sup>     | Cardiovascular<br>Disease or<br>Diabetes<br>Adult | Wave 6<br>N=557<br>Way 7<br>N= 506 | WHO-CIDI       | 20.3%<br>recurrent<br>MDD, 19%<br>single episode<br>MDD | N/A          | US       | No     | No              |       |
| <b>Psychoneuroendocrinology</b><br>(Meyers et al., 2013) <sup>55</sup>             | Diabetes<br>Adults                                | N=145<br>M=49                      | QIDS-SR, PHQ-9 | 37.9%                                                   | N/A          | US       | No     | No              |       |
| <b>JAMA Psychiatry</b><br>(Sullivan et al., 2013) <sup>56</sup>                    | Diabetes<br>Adults                                | N=2977<br>M=                       | PHQ-9          | 18%                                                     | N/A          | US       | No     | No              |       |

| Journal (Authors)                                                                                                                              | Population                | Sample Size      | Measures                                                   | Depression Rate | Anxiety Rate | Location  | Review | Matched Healthy | Notes |
|------------------------------------------------------------------------------------------------------------------------------------------------|---------------------------|------------------|------------------------------------------------------------|-----------------|--------------|-----------|--------|-----------------|-------|
| <b>Asian journal of psychiatry<br/>(Gehlawat et al., 2013)<sup>57</sup></b>                                                                    | Diabetes<br>Adults        | N=410<br>M=51    | HAM-D                                                      |                 |              | India     | No     | No              |       |
| <b>Journal of Affective Disorders<br/>(Akena et al., 2015)<sup>58</sup></b>                                                                    | Diabetes<br>Adults        | N=437<br>M=51    | MINI, MNSI,<br>WHO-QOL                                     | 34.8%           | N/A          | Uganda    | No     | No              |       |
| <b>Journal of Behavioral Science<br/>(Mayberry et al., 2014)<sup>59</sup></b>                                                                  | Diabetes<br>Adults        | N=314<br>M=52    | PHQ-9                                                      | 24%             | N/A          | US        | No     | No              |       |
| <b>Journal of Behavioral Science<br/>(Carper et al., 2014)<sup>60</sup></b>                                                                    | Type 2 Diabetes<br>Adults | N=146<br>M=56    | QOLI, DDS,<br>MADRS                                        | 56.8%           | N/A          | US        | No     | No              |       |
| <b>Journal of Nursing Research<br/>(Wu et al., 2013)<sup>61</sup></b>                                                                          | Type 2 Diabetes<br>Adults | N=111            | Beck depression<br>inventory, Beck<br>anxiety<br>inventory | 12.6%           | 27%          | Taiwan    | No     | No              |       |
| <b>Iranian Red Crescent Medical<br/>Journal<br/>(Palizgir et al., 2013)<sup>62</sup></b>                                                       | Type 2 Diabetes<br>Adults | N=184, 22-<br>78 | Beck depression<br>inventory, Beck<br>anxiety<br>inventory | 70.7%           | 69.9%        | Iran      | No     | No              |       |
| <b>BMJ open<br/>(Ganasegeran et al., 2014)<sup>63</sup></b>                                                                                    | Type 2 Diabetes<br>Adults | N=169<br>M=37    | HADS                                                       | 40.3%           | 31.4%        | Malaysia  | No     | No              |       |
| <b>Medical science monitor: Int'l<br/>Med journal of experimental<br/>and clinical research<br/>(Mikaliukstiene et al., 2014)<sup>64</sup></b> | Type 2 Diabetes<br>Adults | N=1022<br>M=59   | HADS                                                       | 28.5%           | 42.4%        | Lithuania | No     | No              |       |

| Journal (Authors)                                                         | Population                                    | Sample Size                    | Measures                 | Depression Rate                                                                                                           | Anxiety Rate | Location         | Review | Matched Healthy                 | Notes |
|---------------------------------------------------------------------------|-----------------------------------------------|--------------------------------|--------------------------|---------------------------------------------------------------------------------------------------------------------------|--------------|------------------|--------|---------------------------------|-------|
| <b>Epilepsy &amp; Behavior (Mensah et al., 2006)<sup>65</sup></b>         | Epilepsy Adults                               | N=515                          | HADS                     | 27.8%<br>(includes<br>borderline<br>and clinical)                                                                         | N/A          | US               | No     | No                              |       |
| <b>Epilepsy &amp; Behavior (Thapar et al., 2009)<sup>66</sup></b>         | Epilepsy Adults                               | N=443                          | HADS                     | 10.9% for<br>those<br>currently<br>experiencing<br>seizures vs.<br>4.4% of those<br>who were<br>currently<br>seizure-free | N/A          | US               | No     | No                              |       |
| <b>Chest<br/>(Schneider et al., 2010)<sup>67</sup></b>                    | COPD<br>Adults                                | N= 35,722<br>vs. Controls      | Diagnosis in<br>Database | odds ratio<br>1.44 23.1% vs<br>16.8%                                                                                      | N/A          | UK               | No     | Yes                             |       |
| <b>Chronic Respiratory Disease<br/>(Akhtar et al., 2013)<sup>68</sup></b> | Idiopathic<br>Pulmonary<br>Fibrosis<br>Adults | N= 118<br>34-96 years          | WDI                      | 49.20%                                                                                                                    | N/A          | Scotland         | No     | National<br>Prevalence:<br>2.6% |       |
| <b>Archives of Neuropsychiatry<br/>(Aysal et al., 2013)<sup>69</sup></b>  | Myasthenia<br>gravis<br>Adults                | N=42, ages<br>18-78,<br>M=42.6 | BDI, BAI                 | 40.5%                                                                                                                     | 9.5%         | Turkey           | No     | No                              |       |
| <b>National Medical Association<br/>(Hasan et al., 2003)<sup>70</sup></b> | Sickle Cell<br>Adults                         | N= 60<br>21-64 years           | BDI                      | 44%                                                                                                                       | N/A          | Washington<br>DC | No     | No                              |       |

| Journal (Authors)                                                                          | Population                  | Sample Size                                                                                                                              | Measures  | Depression Rate                                                                                                                                                  | Anxiety Rate                                                                                                                               | Location    | Review | Matched Healthy | Notes |
|--------------------------------------------------------------------------------------------|-----------------------------|------------------------------------------------------------------------------------------------------------------------------------------|-----------|------------------------------------------------------------------------------------------------------------------------------------------------------------------|--------------------------------------------------------------------------------------------------------------------------------------------|-------------|--------|-----------------|-------|
| <b>Journal of Pediatric Psychology</b><br><b>(Feldman et al., 2013)<sup>71</sup></b>       | Asthma Parents & Caregivers | N= 97<br><br>7-11 years old (mean age 9.45)                                                                                              | SCID      | 28.1% (any current depressive disorder)                                                                                                                          | 37.5% (any current anxiety disorder)                                                                                                       | US          | No     | No              |       |
| <b>Journal of Nervous and Mental Disease</b><br><b>(Feldman et al., 2011)<sup>72</sup></b> | Asthma Parents & Caregivers | N=641<br><br>10-25 years old (mean age 16.31 for asthma group; mean age 17.68 in healthy controls)                                       | CIDI      | 19.38% for caregivers of youth who had EVER had an asthma attack;<br>7.42% for caregivers of youth who had NEVER had an asthma attack (sig difference - p<.0001) | 11.89% for caregivers of youth who had EVER had an asthma attack;<br>7.71% for caregivers of youth who had NEVER had an asthma attack (ns) | Puerto Rico | No     | Yes             |       |
| <b>Pediatric Allergy &amp; Immunology</b><br><b>(Szabo et al., 2010)<sup>73</sup></b>      | Asthma Parents & Caregivers | N=108 parents of children with asthma and<br>N=27 parents of children with chronic renal disease<br>Total N = 135<br><br>Ages 7-17 years | BDI, STAI | For caregivers of children with asthma:<br>Men: 39%, women: 33%.<br>For caregivers of children with renal disease: Men: 14%, women: 50%                          | Not reported                                                                                                                               | Hungary     | No     | No              |       |

| Journal (Authors)                                                                    | Population                  | Sample Size                                                       | Measures                                             | Depression Rate                                                                  | Anxiety Rate                                                       | Location    | Review | Matched Healthy | Notes                                                                           |
|--------------------------------------------------------------------------------------|-----------------------------|-------------------------------------------------------------------|------------------------------------------------------|----------------------------------------------------------------------------------|--------------------------------------------------------------------|-------------|--------|-----------------|---------------------------------------------------------------------------------|
| <b>Journal of Asthma (Martinez et al., 2009)<sup>74</sup></b>                        | Asthma Parents & Caregivers | N=221<br>mean age 7.35 years old (range 5-12 years old)           | CES-D                                                | 33%                                                                              | N/A                                                                | Puerto Rico | No     | No              | Similar prev. of dep. among community samples of women in PR from low SES areas |
| <b>Journal of Pediatric Psychology (Dahlquist et al., 1993)<sup>75</sup></b>         | Cancer Parents & Caregivers | N=134<br>Mean age 6.88 years old; range: 3 months - 17 y 2 months | BDI, STAI                                            | 13% mothers, 8% fathers                                                          | State: 13% mothers, 12% fathers;<br>Trait: 12% mothers, 3% fathers | US          | No     | No              |                                                                                 |
| <b>Journal of Pediatric Psychology (Manne et al., 1995)<sup>76</sup></b>             | Cancer Parents & Caregivers | N= 59<br>Mean age 11.6 years old; range 3-18 years                | BDI                                                  | 58% immediately post-diagnosis; 51% at 3-month follow-up (no intervention given) | N/A                                                                | US          | No     | No              |                                                                                 |
| <b>Journal of Pediatric Psychology (Van Dongen-Melman et al., 1995)<sup>77</sup></b> | Cancer Parents & Caregivers | N= 133<br>range: 8-12 years old                                   | STAI, Self-Rating Depression Scale (SDS; Zung, 1965) | 31%                                                                              | 42%                                                                | Netherlands | No     | No              |                                                                                 |

| Journal (Authors)                                                                      | Population                          | Sample Size                                                                                | Measures       | Depression Rate                                          | Anxiety Rate              | Location | Review | Matched Healthy | Notes |
|----------------------------------------------------------------------------------------|-------------------------------------|--------------------------------------------------------------------------------------------|----------------|----------------------------------------------------------|---------------------------|----------|--------|-----------------|-------|
| <b>Journal of Pediatric Oncology Nursing (Elkin et al., 2007)<sup>78</sup></b>         | Cancer Parents & Caregivers         | N=27<br><br>Mean age 12.78 years old                                                       | BDI-II         | 30%                                                      | N/A                       | US       | No     | No              |       |
| <b>Journal of Pediatric Psychology (Greening &amp; Stoppelbein, 2008)<sup>79</sup></b> | Cancer Parents & Caregivers         | N=150<br><br>Mean age 11.51 years old; range 6-18 years old                                | BDI-II, STAI-S | 1%                                                       | 7%                        | US       | No     | No              |       |
| <b>Psycho-Oncology (Fotiadou et al., 2008)<sup>80</sup></b>                            | Cancer Parents & Caregivers         | N=100 study group;<br>N=117 control group<br><br>Mean 8 years old;<br>Range 0-16 years old | HADS           | 27% of women, 17% of men                                 | 68% for women, 37% of men | UK       | No     | Yes             |       |
| <b>Journal of Pediatric Psychology (Rodriguez et al., 2013)<sup>81</sup></b>           | Cancer Parents & Caregivers         | N=94<br><br>Mean age 10.4 years old; range 5-18 years old                                  | BDI-II         | 45%                                                      | N/A                       | US       | No     | No              |       |
| <b>Journal of Pediatric Psychology (Manuel et al., 2003)<sup>82</sup></b>              | Cerebral palsy Parents & Caregivers | N=270<br><br>1.1-17.8 years old                                                            | CES-D          | 30% of mothers had depressive symptoms above the cut off | N/A                       | US       | No     | No              |       |

| Journal (Authors)                                                                             | Population                                 | Sample Size                                                                     | Measures    | Depression Rate                                              | Anxiety Rate                                           | Location | Review | Matched Healthy | Notes |
|-----------------------------------------------------------------------------------------------|--------------------------------------------|---------------------------------------------------------------------------------|-------------|--------------------------------------------------------------|--------------------------------------------------------|----------|--------|-----------------|-------|
| <b>American Journal of Hospice and Palliative Medicine (Fauman et al., 2011)<sup>83</sup></b> | Chronic Illness<br>Parents &<br>Caregivers | N=61<br><br>18 months-<br>18 years old                                          | BDI-II      | 56.3% of<br>mothers,<br>20.9% of<br>fathers                  | N/A                                                    | US       | No     | No              |       |
| <b>Journal of Pediatric Psychology (Driscoll et al., 2010)<sup>84</sup></b>                   | Type 1 Diabetes<br>Parents &<br>Caregivers | N=108<br><br>Mean age<br>8.14 years<br>old                                      | CES-D       | 33.30%                                                       | N/A                                                    | US       | No     | No              |       |
| <b>Children's Health Care (Jaser et al., 2009)<sup>85</sup></b>                               | Type 1 Diabetes<br>Parents &<br>Caregivers | N=67<br><br>1-8 years old<br>(mean age<br>4.77)                                 | CES-D, STAI | 24% of<br>mothers<br>clinically<br>significant<br>depression | 21%<br>mothers<br>clinically<br>significant<br>anxiety | US       | No     | No              |       |
| <b>Journal of Pediatric Psychology (Jaser et al., 2008)<sup>86</sup></b>                      | Type 1 Diabetes<br>Parents &<br>Caregivers | N=108<br>(mothers<br>only)<br><br>8-12 years<br>old (mean<br>9.94 years<br>old) | CES-D       | 22.20%                                                       | N/A                                                    | US       | No     | No              |       |
| <b>Hellenic Journal of Nursing Science (Albani et al., 2010)<sup>87</sup></b>                 | Type 1 Diabetes<br>Parents &<br>Caregivers | N=83<br><br>Range: 6-10<br>years old                                            | STAI        | N/A                                                          | 51.8%<br>(state), 53%<br>(trait)                       | Greece   | No     | No              |       |
| <b>Child: Care, Health, and Development (Hilliard et al., 2010)<sup>88</sup></b>              | Type 1 Diabetes<br>Parents &<br>Caregivers | N=73 (2-6<br>years old)M<br>age 4.4 years                                       | STAI        | N/A                                                          | 21%                                                    | US       | No     | No              |       |

| Journal (Authors)                                                                     | Population                           | Sample Size                                                   | Measures    | Depression Rate | Anxiety Rate | Location | Review | Matched Healthy | Notes |
|---------------------------------------------------------------------------------------|--------------------------------------|---------------------------------------------------------------|-------------|-----------------|--------------|----------|--------|-----------------|-------|
| <b>Diabetic Medicine (Williams et al., 2009)<sup>89</sup></b>                         | Type 1 Diabetes Parents & Caregivers | N=187<br><br>Mean age 14.4 years old; range 10-17.9 years old | CES-D, STAI | 22%             | 24%          | US       | No     | No              |       |
| <b>Journal of Pediatric Psychology (Hood, 2009)<sup>90</sup></b>                      | Type 1 Diabetes Parents & Caregivers | N=187<br><br>Mean age 14.4 years old (10-18)                  | CES-D       | 22%             | N/A          | US       | No     | No              |       |
| <b>Health Psychology (Mackey et al., 2014)<sup>91</sup></b>                           | Diabetes Parents & Caregivers        | N=225 (mothers and their young adolescents M=13)              | BDI-II      | 21%             | N/A          | US       | No     | No              |       |
| <b>Maternal and Child Health Journal (Jaser et al., 2014)<sup>92</sup></b>            | Diabetes Parents & Caregivers        | N=118                                                         | CES-D, STAI | 18%             | 13%          | U.S.     | No     | No              |       |
| <b>Journal for Specialists in Pediatric Nursing (Shore et al., 2002)<sup>93</sup></b> | Epilepsy Parents & Caregivers        | N=115<br><br>Range: 11-18 years old                           | CES-D       | 36%             | N/A          | US       | No     | No              |       |

| Journal (Authors)                                                                                | Population                    | Sample Size                                                    | Measures | Depression Rate                                                                                                                         | Anxiety Rate | Location     | Review | Matched Healthy                                                                                                                            | Notes |
|--------------------------------------------------------------------------------------------------|-------------------------------|----------------------------------------------------------------|----------|-----------------------------------------------------------------------------------------------------------------------------------------|--------------|--------------|--------|--------------------------------------------------------------------------------------------------------------------------------------------|-------|
| <b>Acta Neurologica Scandinavica</b><br>(Lv et al., 2009) <sup>94</sup>                          | Epilepsy Parents & Caregivers | N=263<br>Range: 6-18 years old                                 | ZDS, ZAS | 38.40%                                                                                                                                  | 21.67%       | China        | No     | Yes - anxiety and depression prevalence were significantly higher in parents of epileptic children compared to parents of healthy children |       |
| <b>Biomedical and Environmental Sciences</b><br>(Li et al., 2008) <sup>95</sup>                  | Epilepsy Parents & Caregivers | N=340<br>4-8 years old<br>(M age 9.1)                          | HADS     | N/A                                                                                                                                     | 56.20%       | China        | No     | No                                                                                                                                         |       |
| <b>Neurosciences</b><br>(Shariff et al., 2013) <sup>96</sup>                                     | Epilepsy Parents & Caregivers | N=31<br>Mean age 6.49 years old; range 8 months - 13 years old | HADS     | 38.70%                                                                                                                                  | 55.00%       | Saudi Arabia | No     | No                                                                                                                                         |       |
| <b>Social Psychiatry and Psychiatric Epidemiology</b><br>(Ferro & Speechley, 2012) <sup>97</sup> | Epilepsy Parents & Caregivers | N=210<br>Mean age 7.6 years; range = 4-12 years old            | CES-D    | 38% immediately after diagnosis<br>30% at 6 months post-diagnosis<br>32% at 12 months post-diagnosis<br>30% at 24 months post-diagnosis | N/A          | Canada       | No     | No                                                                                                                                         |       |

## References

1. Goodwin RD, Fergusson DM, & Horwood LJ. Asthma and depressive and anxiety disorders among young persons in the community. *Psychol Med*, 2004;34(8):1465-1474.
2. Goodwin RD, Messina K, Bregante A, et al. Prevalence of probable mental disorders among pediatric asthma patients in an inner-city clinic. *J Asthma*, 2005;42:643-674.
3. Katon W, Lozano P, Russo J, McCauley E, et al. The prevalence of DSM-IV anxiety and depressive disorders in youth with asthma compared with controls. *J Adolesc Health*, 2007;41:455-463.
4. Richardson LP, Russo JE, Lozano P, et al. The effect of comorbid anxiety and depressive disorders on health care utilization and costs among adolescents with asthma. *Gen Hosp Psychiatry*, 2008;30:398-406.
5. Allen R, Newman SP, Souhami RL. Anxiety and depression in adolescent cancer: findings in patients and parents at time of diagnosis. *Eur J Cancer*, 1997;33(8):1250-1255.
6. Von Essen L, Enskär K, Kreuger A, et al. Self-esteem, depression and anxiety among Swedish children and adolescents on and off cancer treatment. *Acta Paediatr*, 2000;89:229-36.
7. Hendstrom M, Ljungman G, von Essen L. Perceptions of distress among adolescents recently diagnosed with cancer. *J Pediatr Hematol Oncol*, 2005;27:15-22.
8. Matziou V, Perdikaris P, Galanis P, et al. Evaluating depression in a sample of children and adolescents with cancer in Greece. *Int Nurs Rev*, 2008;55:314-319.
9. Kersun LS, Rourke MT, Mickley M, Kazak AE. Screening for depression and anxiety in adolescent cancer patients. *J Pediatr Hematol Oncol*, 2009;31:835-839.
10. Deyell RJ, Lorenzi M, Ma S, et al. Antidepressant use among survivors of childhood, adolescent and young adult cancer: a report of the Childhood, Adolescent and Young Adult Cancer Survivor (CAYACS) Research Program. *Pediatr Blood Cancer*, 2013;60(5):816-822.
11. Wu LM, Sheen JM, Shu HL, et al. Predictors of anxiety and resilience in adolescents undergoing cancer treatment. *J Adv Nurs*, 2013;69(1):158-166.
12. Myers RM, Balsamo L, Lu X, et al. A prospective study of anxiety, depression, and behavioral changes in the first year after a diagnosis of childhood acute lymphoblastic leukemia. *Cancer*, 2013;120(9): 1417-1425.
13. Key JD, Brown RT, Marsh LD, et al. Depressive symptoms in adolescents with a chronic illness. *Child Health Care*, 2001;30(4):283-292.
14. Grey M, Whittemore R, Tamborlane W. Depression in type I diabetes in children: natural history and correlates. *J Psychosom Res*, 2002;53:907-911.
15. Lawrence JM, Standiford DA, Loots B, et al. Prevalence and correlates of depressed mood among youth with diabetes: the SEARCH for diabetes in youth study. *Pediatrics*, 2006;117(4):1348-1358.
16. Hood KK, Huestis S, Maher A, et al. Depressive symptoms in children and adolescents with type 1 diabetes. *Diabetes Care*, 2006;29(6):1389-1391.
17. Colton PA, Olmsted MP, Daneman D, Rodin GM. Depression, disturbed eating behavior, and metabolic control in teenage girls with type 1 diabetes. *Pediatric diabetes*, 2013;14(5), 372-376.
18. Bernstein CM, Stockwell MS, Gallagher MP, Rosenthal SL, Soren K. Mental health issues in adolescents and young adults with type 1 diabetes prevalence and impact on glycemic control. *Clinical pediatrics*, 2013;52(1), 10-15.
19. Pinhas-Hamiel O, & Levy-Shraga Y. Eating disorders in adolescents with type 2 and type 1 diabetes. *Curr Diab Rep*, 2013;13(2):289-297.
20. Banihani R, Smile S, Yoon G, Dupuis A, Mosleh M, Snider A, McAdam L. Cognitive and Neurobehavioral Profile in Boys With Duchenne Muscular Dystrophy. *Journal of child neurology*, 2015; 0883073815570154.
21. Oguz A, Kurul S, Dirik E, & Eylül D. Relationship of epilepsy-related factors to anxiety and depression scores in epileptic children. *Journal of Child Neurology*, 2002;17:37-40.
22. Baki O, Erdogan A, Kantarci O, et al. Anxiety and depression in children with epilepsy and their mothers. *Epilepsy Behav*, 2004, 5:958-964.
23. Caplan R, Siddarth P, Gurbani S, et al. Depression and anxiety disorders in pediatric epilepsy. *Epilepsia*, 2005;46(5):720-730.
24. Reilly C, Agnew R, & Neville BGR. Depression and anxiety in childhood epilepsy: a review. *Seizure*, 2011;20:589-597.

25. Liu S, Wu R, Li L, Liu L, Li G, Zhang X, et al. The Prevalence of Anxiety and Depression in Chinese Asthma Patients. *PloS one*, 2014;9(7), e103014.
26. Kugaya A, Akechi T, Okuyama T, et al. Prevalence, predictive factors, and screening for psychologic distress in patients with newly diagnosed head and neck cancer. *Cancer*, 2000;88:2817-23.
27. Brintzenhofe-Szoc K, Levin T, Li Y, et al. Mixed anxiety/depression symptoms in a large cancer cohort: prevalence by cancer type. *Psychosom*, 2009;50:383-391.
28. Linden W, Vodermaier A, MacKenzie R, & Greig D. Anxiety and depression after cancer diagnosis: prevalence rates by cancer type, gender, and age. *J Affect Disord*, 2012;141:343-351.
29. Mitchell AJ, Ferguson DW, Gill J, et al. Depression and anxiety in long-term cancer survivors compared with spouses and healthy controls: a systematic review and meta-analysis. *Lancet*, 2013;14(8):721-32.
30. Carlson LE, Waller A, Groff SL, Giese-Davis J, et al. What goes up does not always come down: patterns of distress, physical and psychosocial morbidity in people with cancer over a one year period. *Psychooncology*, 2013;22(1): 168-176.
31. Hong JS, Tian J. Prevalence of anxiety and depression and their risk factors in Chinese cancer patients. *Supportive Care Cancer*, 2014;22(2): 453-459.
32. Boyes AW, Girgis A, D'Este CA, et al. Prevalence and predictors of the short-term trajectory of anxiety and depression in the first year after a cancer diagnosis: a population-based longitudinal study. *J Clin Oncol*, 2013;JCO-2012.
33. Walker J, Hansen CH, Martin P, et al. Prevalence of depression in adults with cancer: a systematic review. *Ann Oncol*, 2013;24(4): 895-900.
34. Stafford L, Judd F, Gibson P, et al. Screening for depression and anxiety in women with breast and gynaecologic cancer: course and prevalence of morbidity over 12 months. *Psychooncology*, 2013;22(9):2071-2078.
35. Krebber AMH, Buffart LM, Kleijn G, et al. Prevalence of depression in cancer patients: a meta-analysis of diagnostic interviews and self-report instruments. *Psychooncology*, 2014;23(2):121-130.
36. Singer S, Szalai C, Briest S, et al. Co-morbid mental health conditions in cancer patients at working age—prevalence, risk profiles, and care uptake. *Psychooncology*, 2013;22(10):2291-2297.
37. Mackenzie L J, Carey M L, Sanson-Fisher R W, et al. Psychological distress in cancer patients undergoing radiation therapy treatment. *Supportive Care Cancer*, 2013;21(4):1043-1051.
38. Neilson K, Pollard A, Boonzaier A, et al. A longitudinal study of distress (depression and anxiety) up to 18 months after radiotherapy for head and neck cancer. *Psychooncology*, 2013;22(8):1843-1848.
39. Brinkman TM, Zhu L, Zeltzer LK, et al. Longitudinal patterns of psychological distress in adult survivors of childhood cancer. *British Journal of Cancer*, 2013;109(5): 1373-1381.
40. Watts S, Leydon G, Birch B, et al. Depression and anxiety in prostate cancer: a systematic review and meta-analysis of prevalence rates. *BMJ open*, 2014;4(3): e003901.
41. Yang YL, Liu L, Wang Y, et al. The prevalence of depression and anxiety among Chinese adults with cancer: a systematic review and meta-analysis. *BMC cancer*, 2013;13(1): 393.
42. Walker J, Hansen CH, Martin P, Symeonides S, Ramessur R, Murray G, Sharpe M. Prevalence, associations, and adequacy of treatment of major depression in patients with cancer: a cross-sectional analysis of routinely collected clinical data. *The Lancet Psychiatry*, 2014;1(5), 343-350.
43. Willgoss T, Yohannes A. Anxiety disorders in patients with COPD: A systematic review. *Respiratory Care*, 2013;58(5).
44. Anderson RJ, Freedland KE, Clouse RE, Lustman PJ. The prevalence of comorbid depression in adults with diabetes. *Diabetes Care*, 2001;24(6):1069-1078.
45. Li C, Ford ES, Strine TW, Mokdad Ah. Prevalence of depression among U.S. adults with diabetes. *Diabetes Care*, 2008;31(1):105-107.
46. Ali S, Stone MA, Peters JL, et al. The prevalence of co-morbid depression in adults with type 2 diabetes: a systematic review and meta-analysis. *Diabet Med*, 2006;23:1165-1173.
47. Barnard KD, Skinner TC, Peveler R. The prevalence of comorbid depression in adults with type 1 diabetes: a systematic literature review. *Diabet Med*, 2006;23:445-448.
48. De Winter CF, Hermans H, Evenhuis HM, Ehteld MA. Associations of symptoms of anxiety and depression with diabetes and cardiovascular risk factors in older people with intellectual disability. *J Intellect Disabil Res*, 2015;59(2):176-185.

49. Smith KJ & Schmitz N. Association of depression and anxiety symptoms with functional disability and disability days in a community sample with type 2 diabetes. *Psychosomatics*, 2014;55(6):659-667.
50. Deschênes SS, Burns RJ, Schmitz N. Associations between diabetes, major depressive disorder and generalized anxiety disorder comorbidity, and disability: Findings from the 2012 Canadian Community Health Survey—Mental Health (CCHS-MH). *J Psychosom Res*, 2015;78(2):137-142.
51. Mezuk B, Chen Y, Yu C, et al. Depression, anxiety, and prevalent diabetes in the Chinese population: Findings from the China Kadoorie Biobank of 0.5 million people. *J Psychosom Res*, 2013;75(6):511-517.
52. Tanenbaum ML, Ritholz MD, Binko DH, et al. Probing for depression and finding diabetes: A mixed-methods analysis of depression interviews with adults treated for type 2 diabetes. *J Affect Disord*, 2013;150(2):533-539.
53. Niraula K, Kohrt BA, Flora MS, et al. Prevalence of depression and associated risk factors among persons with type-2 diabetes mellitus without a prior psychiatric history: A cross-sectional study in clinical settings in urban Nepal. *BMC Psychiatry*, 2013;13.
54. Windle M, & Windle RC. Recurrent depression, cardiovascular disease, and diabetes among middle-aged and older adult women. *J affect Disord*, 2013;150(2):895-902.
55. Meyers AK, Grannemann BD, Lingway I, et al. Brief report: depression and history of suicide attempts in adults with new-onset type 2 diabetes. *Psychoneuroendocrinology*, 2013;38(11):2810-14.
56. Sullivan MD, Katon WJ, Lovato LC, et al. Association of depression with accelerated cognitive decline among patients with type 2 diabetes in the ACCORD-MIND trial. *JAMA Psychiatry*, 2013;70(10):1041-47.
57. Gehlawat P, Gupa R, Rajput R, et al. Diabetes with comorbid depression: Role of SSRI in better glycemic control. *Asian J Psychiatr*, 2013;6(5):364-368.
58. Akena D, Kadama P, Akello C, Kwesiga B, Rejani L, Okello J, et al. The association between depression, quality of life, and the health care expenditure of patients with diabetes mellitus in Uganda. *Journal of affective disorders*, 2015;174, 7-12.
59. Mayberry LS, Egede LE, Wagner JA, Osborn CY. Stress, depression and medication nonadherence in diabetes: test of the exacerbating and buffering effects of family support. *Journal of behavioral medicine*, 2014;1-9.
60. Carper MM, Traeger L, Gonzalez JS, Wexler DJ, Psaros C, Safren SA. The differential associations of depression and diabetes distress with quality of life domains in type 2 diabetes. *Journal of behavioral medicine*, 2014;37(3), 501-510.
61. Wu SFV, Young LS, Yeh FC, Jian YM, Cheng KC, Lee MC. Correlations among social support, depression, and anxiety in patients with type-2 diabetes. *Journal of Nursing Research*, 2013;21(2), 129-138.
62. Palizgir M, Bakhtiari M, Esteghamati A. Association of depression and anxiety with diabetes mellitus type 2 concerning some sociological factors. *Iranian Red Crescent Medical Journal*, 2013;15(8), 644.
63. Ganasegeran K, Renganathan P, Manaf RA, Al-Dubai SAR. Factors associated with anxiety and depression among type 2 diabetes outpatients in Malaysia: a descriptive cross-sectional single-centre study. *BMJ open*, 2014;4(4), e004794.
64. Mikaliūkštienė A, Žagminas K, Juozulynas A, Narkauskaitė L, Sąlyga J, Jankauskienė K, et al. Prevalence and determinants of anxiety and depression symptoms in patients with type 2 diabetes in Lithuania. *Medical science monitor: international medical journal of experimental and clinical research*, 2014;20, 182.
65. Mensah SA, Beavis JM, Thapar AK, Kerr M. The presence and clinical implications of depression in a community of adults with epilepsy. *Epilepsy Behav*, 2006;8:213-219.
66. Thapar A, Kerr M, Harold G. Stress, anxiety, depression, and epilepsy: investigating the relationship between psychological factors and seizures. *Epilepsy Behav*, 2009;14:134-140.
67. Schneider C, Jick SS, Bothner U, Meier CR. COPD and the risk of depression. *Chest*, 2010;137(2):341-347.
68. Akhtar AA, Ali MA, Smith RP. Depression in patients with idiopathic pulmonary fibrosis. *Chron Respir Dis*, 2013;10(3):127-133.
69. Aysal F, Karamustafalıoğlu O, Özçelik B, Yılma M, Karamustafalıoğlu N, Yumrukça H, Tankaya O. The relationship of symptoms of anxiety and depression with disease severity and treatment modality in myasthenia gravis: A cross-sectional study. *Nöropsikiyatri Arşivi / Archives Of Neuropsychiatry*, 2013;50(4), 295-300. doi:10.4274/npa.y5611
70. Hasan SP, Hasmi S, Alhassen M, et al. Depression in sickle cell disease. *J Natl Med Assoc*, 2003;95:533-538.

71. Feldman JM, Steinberg D, Kutner H, et al. Perception of pulmonary function and asthma control: the differential role of child versus caregiver anxiety and depression. *J Pediatr Psychol*, 2013;38(10):1091-1100.
72. Feldman JM, Acosta Perez E, Casino G, et al. The role of caregiver major depression in the relationship between anxiety disorders and asthma attacks in island Puerto Rican youth and young adults. *J Nerv Ment Dis*, 2011;199(5):313-318.
73. Szabo A, Mezei G, Kovari E, Cserhai E. Depressive symptoms amongst asthmatic children's caregivers. *Pediatr Allergy Immunol*, 2010;21(4p2):e667-e673.
74. Martinez KG, Perez EA, Ramirez R, et al. The role of caregivers' depressive symptoms and asthma beliefs on asthma outcomes among low-income Puerto Rican children. *J Asthma*, 2009;46(2):136-141.
75. Dahlquist LM, Czyzewski DI, Copeland KG, et al. Parents of children newly diagnosed with cancer: anxiety, coping, and marital distress. *J Pediatr Psychol*, 1993;18(3):365-376.
76. Manne SL, Lesanics D, Meyers P, et al. Predictors of depressive symptomatology among parents of newly diagnosed children with cancer. *J Pediatr Psychol*, 1995;20(4):491-510.
77. Van Dongen-Melman JEW, Pruyn JFA, De Groot A, et al. Late psychosocial consequences for parents of children who survived cancer. *J Pediatr Psychol*, 1995;20(5):567-586.
78. Elkin TD, Jensen SA, McNeil L, et al. Religiosity and coping in mothers of children diagnosed with cancer: an exploratory analysis. *J Pediatr Oncol Nurs*, 2007;24(5):274-278.
79. Greening L & Stoppelbein L. Brief report: pediatric cancer, parental coping style, and risk for depressive, posttraumatic stress, and anxiety symptoms. *J Pediatr Psychol*, 2008;32(10):1272-1277.
80. Fotiadou M, Barlow JH, Powell LA, Langton H. Optimism and psychological well-being among parents of children with cancer: an exploratory study. *Psychooncology*, 2008;17:401-409.
81. Rodriguez EM, Dunn MJ, Zuckerman T, et al. Mother-child communication and maternal depressive symptoms in families of children with cancer: integrating macro and micro levels of analysis. *J Pediatr Psychol*, 2013;38(7):732-743.
82. Manuel J, Naughton MJ, Balkrishnan R, et al. Stress and adaptation in mothers of children with cerebral palsy. *J Pediatr Psychol*, 2003, 28(3):197-201.
83. Fauman KR, Pituch KJ, Han YY, et al. Predictors of depressive symptoms in parents of chronically ill children admitted to the pediatric intensive care unit. *Am J Hosp Care*, 2011;28(8):556-563.
84. Driscoll KA, Bennett Johnson S, Barker D, et al. Risk factors associated with depressive symptoms in children with type 1 diabetes or cystic fibrosis. *J Pediatr Psychol*, 2010;35(8):814-822.
85. Jaser SS, Whittemore R, Ambrosino JM, et al. Coping and psychosocial adjustment in mothers with young children with type 1 diabetes. *Child Health Care*, 2009;38(2):91-106.
86. Jaser SS, Whittemore R, Ambrosino JM, et al. Mediators of depressive symptoms in children with type 1 diabetes and their mothers. *J Pediatr Psychol*, 2008;33(5):509-519.
87. Albani E, Gouva M, Marneras C, et al. State and trait anxiety in parents of children with diabetes mellitus type 1. *Hell J Nurs Sci*, 2010;3(2):31-35.
88. Hilliard ME, Monaghan M, Cogen FR, Streisand R. Parent stress and child behavior among young children with type 1 diabetes. *Child Care Health Dev*, 2010;37(2):224-232.
89. Williams LB, Laffel LMB, Hood KK. Diabetes-specific family conflict and psychological distress in paediatric type 1 diabetes. *Diabet Med*, 2009;26:908-914.
90. Hood KK. The influence of caregiver depressive symptoms on proxy report of youth depressive symptoms: a test of the depression-distortion hypothesis in pediatric type 1 diabetes. *J Pediatr Psychol*, 2009;34(3):294-303.
91. Mackey ER, Struempf K, Powell PW, Chen R, Streisand R, Holmes CS. Maternal depressive symptoms and disease care status in youth with type 1 diabetes. *Health Psychology*, 2014;33(8), 783.
92. Jaser SS, Linsky R, Grey M. Coping and psychological distress in mothers of adolescents with type 1 diabetes. *Maternal and child health journal*, 2014;18(1), 101-108.
93. Shore CP, Austin JK, Huster GA, Dunn DW. Identifying risk factors for maternal depression in families of adolescents with epilepsy. *J Spec Pediatr Nurs*, 2002;7(2):71-80.
94. Lv R, Wu L, Jin L, et al. Depression, anxiety, and quality of life in parents of children with epilepsy. *Acta Neurol Scand*, 2009;120:335-341.

95. Li Y, Ji CY, Qin J, Zhang ZX. Parental anxiety and quality of life of epileptic children. *Biomed Environ Sci*, 2008;21:228-232.
96. Shariff EM, Sinha S, Samman SK, et al. Depression and anxiety in parents of children with epilepsy. Are fathers involved? *Neurosci J*, 2013;18:183-184.
97. Ferro MA, & Nixon Speechley K. Examining clinically relevant levels of depressive symptoms in mothers following a diagnosis of epilepsy in their children: a prospective analysis. *Soc Psychiatry Psychiatry Epidemiol*, 2012;47:1419-1428.
