# Supplementary material for: International Committee on Mental Health in Cystic Fibrosis: Cystic Fibrosis Foundation and European Cystic Fibrosis Society consensus statements for screening and treating depression and anxiety
Source: HighWire-hosted journal article supplement (doi:10.1136/thoraxjnl-2015-207488), 2015-10-09
Supplement: thoraxjnl-2015-207488supp_appendixB.pdf [file thoraxjnl-2015-207488supp_appendixB.pdf]

**Table 1. Prevalence of depression and anxiety in cystic fibrosis patients and parent caregivers.**

| Journal (Authors)                                                     | Population               | Sample Size                    | Measures     | Depression Rate                                                          | Anxiety Rate                                                             | Country                                                                           | Review | Matched Healthy | Notes                                                                                            |
|-----------------------------------------------------------------------|--------------------------|--------------------------------|--------------|--------------------------------------------------------------------------|--------------------------------------------------------------------------|-----------------------------------------------------------------------------------|--------|-----------------|--------------------------------------------------------------------------------------------------|
| <b>Thorax (Quittner et al., 2014)<sup>1</sup></b>                     | Adults                   | N=4739                         | HADS, CES-D  | HADS: 13%<br>CES-D: 29%                                                  | 32%                                                                      | 9 countries (US, UK, Spain, Belgium, Turkey, Germany, Italy, Netherlands, Sweden) | No     | No              |                                                                                                  |
| <b>Psychosomatics (Quon et al, 2014)<sup>2</sup></b>                  | Adults                   | N=153                          | PHQ-9, GAD-7 | 7% (Symptom definition)<br>22% (composite definition)                    | 5% (symptom definition)<br>10% (composite definition)                    | US                                                                                | No     | No              | 5% endorsed suicidality item on PHQ-9                                                            |
| <b>Health Psychology (Hilliard et al., 2014)<sup>3</sup></b>          | Adults<br>Mean age: 29.2 | N=128                          | CES-D        | 23%                                                                      | N/A                                                                      | US                                                                                | No     | No              |                                                                                                  |
| <b>J Cyst Fibros (Duff et al., 2014)<sup>4</sup></b>                  | Adults                   | N=1780(CF)<br>N=1788 (Control) | HADS         | Men(CF):13.1%<br>Women(CF):11.9%<br>Men(non-CF): 9%<br>Women(non-CF):14% | Men(CF):30.1%<br>Women(CF):38.5%<br>Men(non-CF):27%<br>Women(non-CF):39% | UK                                                                                | No     | Yes             | For men (but not women): significant differences between CF and non-CF on anxiety and depression |
| <b>J Cyst Fibros (Latchford et al., 2013)<sup>5</sup></b>             | Adults                   | N=232                          | HADS, PHQ-9  | 5.6% (HADS)<br>33.4% (PHQ-9)                                             | N/A                                                                      | UK                                                                                | No     | No              | 10.4% endorsed suicidality item on PHQ-9                                                         |
| <b>Journal of Affective Disorders (Kopp et al., 2013)<sup>6</sup></b> | Adults<br>Mean age: 26.1 | N=30                           | CES-D        | 50%                                                                      | N/A                                                                      | US                                                                                | No     | No              | Hospitalized patients                                                                            |

| Journal (Authors)                                                                 | Population                                                                            | Sample Size                       | Measures                                         | Depression Rate                                                                                           | Anxiety Rate                                                                                                      | Country | Review | Matched Healthy | Notes                                                                                  |
|-----------------------------------------------------------------------------------|---------------------------------------------------------------------------------------|-----------------------------------|--------------------------------------------------|-----------------------------------------------------------------------------------------------------------|-------------------------------------------------------------------------------------------------------------------|---------|--------|-----------------|----------------------------------------------------------------------------------------|
| <b>Respiratory Care (Yohannes et al., 2012)<sup>7</sup></b>                       | Adults<br>18-70 years                                                                 | N=121                             | CF-QOL,<br>HADS                                  | 17% (HADS)                                                                                                | 33%                                                                                                               | UK      | No     | No              |                                                                                        |
| <b>Chest (Goldbeck et al., 2010)<sup>8</sup></b>                                  | Adults with CF<br>Mean age:<br>23.1 years<br>Adults<br>(Control)<br>Mean age:<br>24.6 | N=670 (CF)<br>N=2629<br>(Control) | HADS                                             | Ages 21-30: 11.3%<br>(CF) v. 7.0% (non-<br>CF) (ns)<br>Ages 31-50: 14.0%<br>(CF) v. 16.4%<br>(non-CF)(ns) | Ages 21-30:<br>18.5%(CF) v.<br>9.5%(non-CF)<br>(p<.05)<br>Ages 31-50:<br>27.3%(CF) v.<br>19.2%(non-CF)<br>(p<.05) | Germany | No     | Yes             | Overall<br>depression rate:<br>9.6%(CF)<br>Anxiety rate:<br>20.6%(CF)                  |
| <b>J Cyst Fibros (Havermans et al., 2008)<sup>9</sup></b>                         | Adults<br>Mean<br>age=26.7                                                            | N=57                              | HADS                                             | 13%                                                                                                       | 30%                                                                                                               | Belgium | No     | No              |                                                                                        |
| <b>Chest (Riekert et al., 2007)<sup>10</sup></b>                                  | Adults<br>Mean<br>age=30.6                                                            | N=76                              | BDI                                              | 30.3%                                                                                                     | N/A                                                                                                               | US      | No     | No              |                                                                                        |
| <b>Chest (Anderson et al., 2001)<sup>11</sup></b>                                 | Adults<br>Mean age=<br>28.5                                                           | N=34                              | MMPI-2                                           | 5.9%                                                                                                      | 5.9%                                                                                                              | US      | No     | No              | Prevalence of<br>anxiety and<br>depression were<br>similar to<br>general<br>population |
| <b>J of Child &amp; Adolescent Psychiatry (Pearson et al., 1991)<sup>12</sup></b> | Adults<br>Mean<br>age=24.8                                                            | N=36                              | STAI, Self-<br>report<br>depression<br>inventory | 42.4%                                                                                                     | 22.2%                                                                                                             | US      | No     | No              |                                                                                        |

| Journal (Authors)                                                    | Population                              | Sample Size | Measures        | Depression Rate                      | Anxiety Rate | Country                                                                           | Review | Matched Healthy | Notes                                                                     |
|----------------------------------------------------------------------|-----------------------------------------|-------------|-----------------|--------------------------------------|--------------|-----------------------------------------------------------------------------------|--------|-----------------|---------------------------------------------------------------------------|
| <b>Thorax (Quittner et al., 2014)<sup>1</sup></b>                    | Adolescents                             | N=1286      | HADS, CES-D     | HADS:5%<br>CES-D: 19%                | 22%          | 9 countries (US, UK, Spain, Belgium, Turkey, Germany, Italy, Netherlands, Sweden) | No     | No              |                                                                           |
| <b>Psychosomatics (Smith et al., 2014)<sup>13</sup></b>              | Children/<br>Adolescents<br>7-17 years  | N=38        | CDI             | 28%                                  | N/A          | US                                                                                | No     | No              | Vitamin D insufficiency associated with depressive symptoms               |
| <b>Annals of Pharmacotherapy (Ploessl et al., 2013)<sup>14</sup></b> | Children/<br>Adolescents<br>6-18 years  | N=190       | ICD-9 codes     | 9%                                   | N/A          | US                                                                                | No     | No              | Depressed patients had lower lung function and more hospitalizations      |
| <b>J Cyst Fibros (Besier et al., 2011)<sup>15</sup></b>              | Children/<br>Adolescents<br>12-17 years | N=162       | HADS, CES-D     | 7.4%                                 | 12.3%        | Germany                                                                           | No     | No              |                                                                           |
| <b>Pediatr Pulmonology (Smith et al., 2010)<sup>16</sup></b>         | Children/<br>Adolescents<br>7-17 years  | N=39        | CDI, CES-D, DPD | 29% total<br>7-12: 33%<br>12-17: 25% | N/A          | US                                                                                | No     | No              | Depressive symptoms significantly predicted adherence to airway clearance |
| <b>J Child Adolesc Psychiatry (Burke et al., 1989)<sup>17</sup></b>  | Children/<br>Adolescents                | N=52        | K-SADS          | 11.5%                                | 11.5%        | US                                                                                | No     | No              |                                                                           |

| Journal (Authors)                                                | Population | Sample Size                  | Measures      | Depression Rate                                                                          | Anxiety Rate                 | Country                                                                           | Review | Matched Healthy | Notes |
|------------------------------------------------------------------|------------|------------------------------|---------------|------------------------------------------------------------------------------------------|------------------------------|-----------------------------------------------------------------------------------|--------|-----------------|-------|
| <b>Thorax (Quittner et al., 2014)<sup>1</sup></b>                | Parents    | N= 3127 Mothers, 975 Fathers | HADS, CES-D   | Mothers HADS: 20%, CES-D: 34%<br>Fathers HADS: 18%, CES-D: 25%                           | Mothers: 48%<br>Fathers: 36% | 9 countries (US, UK, Spain, Belgium, Turkey, Germany, Italy, Netherlands, Sweden) | No     | No              |       |
| <b>J Cyst Fibros (Ltluczek et al., 2013)<sup>18</sup></b>        | Parents    | N=72 (CF=33, non-CF=39)      | CES-D         | Children diagnosed from newborn screening: 58%<br>Standard diagnosis: 27%<br>Non-CF: 22% | N/A/                         | US                                                                                | No     | Yes             |       |
| <b>Pediatr Pulmonol (Besier et al., 2011)<sup>15</sup></b>       | Parent     | N=650                        | CES-D<br>HADS | 28%                                                                                      | 37.2%                        | Germany                                                                           | No     | No              |       |
| <b>J Cyst Fibros (Besier &amp; Goldbeck, 2011)<sup>19</sup></b>  | Parent     | N=162                        | HADS<br>CES-D | 26.4%                                                                                    | 37.7%                        | Germany                                                                           | No     | No              |       |
| <b>J of Pediatr Psychol (Driscoll et al., 2010)<sup>20</sup></b> | Parent     | N=87                         | CES-D         | 32.2%                                                                                    | N/A                          | US                                                                                | No     | No              |       |

| Journal (Authors)                                             | Population                       | Sample Size                                         | Measures      | Depression Rate                                                                  | Anxiety Rate | Country | Review | Matched Healthy | Notes |
|---------------------------------------------------------------|----------------------------------|-----------------------------------------------------|---------------|----------------------------------------------------------------------------------|--------------|---------|--------|-----------------|-------|
| <b>Pediatr Pulmonol (Smith et al., 2010)<sup>16</sup></b>     | Parent                           | N=39                                                | CES-D         | Mothers: 35%<br>Fathers: 23%                                                     | N/A          | US      | No     | No              |       |
| <b>Pediatr Pulmonol (Driscoll et al., 2009)<sup>21</sup></b>  | Parent (100 mothers, 22 fathers) | N=122                                               | CES-D<br>HADS | Mothers:<br>28%(CES-D),<br>20%(HADS)<br>Fathers:<br>31%(CES-D),<br>14%(HADS)     | N/A          | US      | No     | No              |       |
| <b>Health Psychology (Quittner et al., 1998)<sup>22</sup></b> | Parent                           | 33 couples with child with CF<br>33 control couples | CES-D         | Women (CF):<br>36.4%<br>Women (non-CF): 21%<br>Men (CF):12%<br>Men (non-CF): 15% | N/A/         | US      | No     | Yes             |       |

## References

1. Quittner AL, Goldbeck L, Abbott J, et al. Prevalence of depression and anxiety in patients with cystic fibrosis and parent caregivers: results of the international depression epidemiological study across nine countries. *Thorax*, 2014;69:1090-1097.
2. Quon BS, Bentham WD, Unutzer J, et al. Prevalence of symptoms of depression and anxiety in adults with cystic fibrosis based on the PHQ-9 and GAD-7 screening questionnaires. *Psychosomatics*, 2014. Advance online publication.
3. Hilliard ME, Eakin MN, Borrelli B, et al. Medication beliefs mediate between depressive symptoms and medication adherence in cystic fibrosis. *Health Psychology*, 2014; Advance online publication.
4. Duff AJA, Abbott J, Cowperthwaite C, et al. Depression and anxiety in adolescents with cystic fibrosis in the UK: a cross-sectional study. *J Cyst Fibros*, 2014;13(6):745-753.
5. Latchford G & Duff AJA. Screening for depression in a single CF centre. *J Cyst Fibros*, 2013;12(6):794-796.
6. Kopp BT, Hayes DJ, Ratkiewicz M, et al. Light exposure and depression in hospitalized adult patients with cystic fibrosis. *Journal of Affective Disorders*, 2014;150(2):585-589.

7. Yohannes AM, Willgoss TG, Fatoye FA, et al. Relationship between anxiety, depression, and quality of life in adult patients with cystic fibrosis. *Respiratory Care*, 2012;57(4):550-556.
8. Goldbeck L, Besier T, Hinz A, et al. Prevalence of symptoms of anxiety and depression in German patients with cystic fibrosis. *Chest*, 2010;138(4):929-936.
9. Havermans T, Colpaert K, & Dupont LJ. Quality of life in patients with cystic fibrosis: association with anxiety and depression. *J Cyst Fibros*, 2008;7:581-584.
10. Riekert KA, Bartlett SJ, Boyle MP, et al. The association between depression, lung function, and health-related quality of life among adults with cystic fibrosis. *Chest*, 2007;132:231-237.
11. Anderson DL, Flume PA, & Hardy KK. Psychological functioning of adults with cystic fibrosis. *Chest*, 2001;119:1079-1084.
12. Pearson DA, Pumariega AJ, & Seilheimer DK. The development of psychiatric symptomatology in patients with cystic fibrosis. *J Am Acad Child Adolesc Psychiatry*, 1991;30(2):290-297.
13. Smith BA, Cogswell A, & Garcia A. Vitamin D and depressive symptoms in children with cystic fibrosis. *Psychosomatics*, 2014;55(1):76-81.
14. Ploessl C, Pettit RS, & Donaldson J. Prevalence of depression and antidepressant therapy use in a pediatric cystic fibrosis population. *Annals of Pharmacotherapy*, 2013;48(4):488-493.
15. Besier T, Born A, Henrich G, et al. Anxiety, depression, and life satisfaction in parents caring for children with cystic fibrosis. *Pediatr Pulmonol*, 2011;46(7):672-682.
16. Smith BA, Modi AC, Quittner AL, & Wood BL. Depressive symptoms in children with cystic fibrosis and parents and its effects on adherence to airway clearance. *Pediatr Pulmonol*, 2010;45:756-763.
17. Burke P, Meyer V, Kocoshis S, et al. Depression and anxiety in pediatric inflammatory bowel disease and cystic fibrosis. *J Am Acad Child Adolesc Psychiatry*, 1989;28(6):948-951.
18. Tluczek A, Laxova A, Grieve A, et al. Long-term follow-up of cystic fibrosis newborn screening: Psychosocial functioning of adolescents and young adults. *J Cyst Fibros*, 2014;13:227-234.
19. Besier T & Goldbeck L. Anxiety and depression in adolescents with CF and their caregivers. *J Cyst Fibros*, 2011;10:435-442.
20. Driscoll KA, Montag-Leifling K, Acton JD, & Modi AC. Relations between depressive and anxious symptoms and quality of life in caregivers of children with cystic fibrosis. *Pediatr Pulmonol*, 2009;44:784-792.
21. Driscoll KA, Bennett Johnson Z, Barker D, et al. Risk factors associated with depressive symptoms in caregivers of children with type 1 diabetes or cystic fibrosis. *J Cyst Fibros*, 2010;35(8):814-822.
22. Quittner AL, Opiari LC, Espelage DL, et al. Role strain in couples with and without a child with a chronic illness: associations with marital satisfaction, intimacy, and daily mood. *Health Psychology*, 1998;17(2):112-124.
