# Supplementary material for: International Committee on Mental Health in Cystic Fibrosis: Cystic Fibrosis Foundation and European Cystic Fibrosis Society consensus statements for screening and treating depression and anxiety
Source: HighWire-hosted journal article supplement (doi:10.1136/thoraxjnl-2015-207488), 2015-10-09
Supplement: thoraxjnl-2015-207488supp_appendixD.pdf [file thoraxjnl-2015-207488supp_appendixD.pdf]

## Appendix D: Intervention

Table 1. English-Language National/International Guidelines for the Treatment of Depression\*

| Guideline<br>(Country,<br>year)                                                                                       | Depression<br>Subtypes                                      | Age Groups                | Settings/Special<br>Population                                                                                             | First-line medications<br>when pharmacologic<br>intervention is needed                                                                                                                                              | Psychological<br>Interventions                                                                                                                                                                                                                                          | Reference                                                                                                                                                                                                                                                                                                                        |
|-----------------------------------------------------------------------------------------------------------------------|-------------------------------------------------------------|---------------------------|----------------------------------------------------------------------------------------------------------------------------|---------------------------------------------------------------------------------------------------------------------------------------------------------------------------------------------------------------------|-------------------------------------------------------------------------------------------------------------------------------------------------------------------------------------------------------------------------------------------------------------------------|----------------------------------------------------------------------------------------------------------------------------------------------------------------------------------------------------------------------------------------------------------------------------------------------------------------------------------|
| <b>AACAP<br/>pediatric<br/>depression<br/>(US, 2007)</b>                                                              | MDD or<br>dysthymia                                         | Children &<br>adolescents | Psychiatric care in<br>unspecified settings<br><br>--Adapt therapies to<br>account for any<br>comorbid physical<br>illness | SSRI, especially fluoxetine                                                                                                                                                                                         | --CBT or IPT<br><br>--Psychodynamic therapy,<br>family or school-based<br>interventions as<br>appropriate (less evidence)                                                                                                                                               | Birmaher B, Brent D, and the AACAP<br>Work Group on Quality Issues, American<br>Academy of Child and Adolescent<br>Psychiatry. Practice Parameter for the<br>Assessment and Treatment of Children<br>and Adolescents with Depressive<br>Disorders. J Am Acad Child Adolesc<br>Psychiatry 2007; 46(11):1503-1526.                 |
| <b>AACAP<br/>Psychiatric<br/>Management<br/>of physically<br/>ill children<br/>and<br/>adolescents<br/>(US, 2009)</b> | Depression as<br>a non-<br>categorical<br>target<br>symptom | Children &<br>adolescents | Physical illness                                                                                                           | Options include:<br><br>--SSRI<br><br>--SNRI<br><br>--Stimulant<br><br>Medication selection and<br>dosing should consider<br>pharmacokinetics,<br>pharmacodynamics, organ<br>systems affected by medical<br>illness | Options include:<br><br>--Supportive therapy<br><br>--Narrative therapy<br><br>--CBT<br><br>--Behavior modification<br><br>--Coping skills and play<br>strategies for procedures<br><br>--Group therapy<br><br>--Family therapy<br><br>--Address symptoms in<br>parents | DeMaso DR, Martini DR, Cahen LA,<br>and the Work Group on Quality Issues<br>(WGQI), American Academy of Child<br>and Adolescent Psychiatry. Practice<br>Parameter for the Psychiatric<br>Assessment and Management of<br>Physically Ill Children and<br>Adolescents. J Am Acad Child Adolesc<br>Psychiatry 2009; 48(2): 213-233. |

|                                                        |                                      |                                                                                    |                                                                                                        |                                                                                                                                                                                                                                                                  |                                                                                                                                                                             |                                                                                                                                                                                                                                                                                                                                                                                       |
|--------------------------------------------------------|--------------------------------------|------------------------------------------------------------------------------------|--------------------------------------------------------------------------------------------------------|------------------------------------------------------------------------------------------------------------------------------------------------------------------------------------------------------------------------------------------------------------------|-----------------------------------------------------------------------------------------------------------------------------------------------------------------------------|---------------------------------------------------------------------------------------------------------------------------------------------------------------------------------------------------------------------------------------------------------------------------------------------------------------------------------------------------------------------------------------|
| <p><b>AACAP psychotropic medication (US, 2009)</b></p> | <p>MDD</p>                           | <p>Children &amp; adolescents</p>                                                  | <p>Prescription of medication to children &amp; adolescents in unspecified settings</p>                | <p>--SSRIs fluoxetine, sertraline, citalopram have more evidence</p> <p>Before prescribing medication:</p> <p>Psychiatric evaluation, medical history, collaboration between health care providers, ensure availability of follow up, consent/assent process</p> | <p>--Combined medication plus CBT is first line for moderate to severe depression in adolescents</p>                                                                        | <p>Walkup J, and the Work Group on Quality Issues, American Academy of Child and Adolescent Psychiatry. Practice Parameter on the Use of Psychotropic Medication in Children and Adolescents. J Am Acad Child Adolesc Psychiatry; 2009; 48(9): 961-73.</p>                                                                                                                            |
| <p><b>APA depression in adults (US, 2010)</b></p>      | <p>MDD</p>                           | <p>Adults</p>                                                                      | <p>Psychiatric care settings</p> <p>--Adapt therapies to account for any comorbid physical illness</p> | <p>--SSRI, SNRI, mirtazapine or bupropion for most patients</p> <p>--Of the SSRIs, sertraline, citalopram, escitalopram have fewer drug-drug interactions</p> <p>--SNRI or TCA possibly preferable for patients with comorbid chronic pain</p>                   | <p>--CBT or IPT</p> <p>--Psychodynamic psychotherapy (less evidence)</p> <p>--Problem solving therapy in mild cases</p> <p>--Couples or family therapy when appropriate</p> | <p>Gelenberg A Freeman M, Markowitz J. Rosenbaum J. Thase M. Trivedi M. Van Rhoads R. American Psychiatric Association Practice Guideline: Treatment of Patients with Major Depressive Disorder. American Psychiatric Association. 2010.</p>                                                                                                                                          |
| <p><b>BAP anti-depressant use (UK, 2008)</b></p>       | <p>Unipolar depressive disorders</p> | <p>Primarily adults; also children &amp; adolescents, elderly, medical illness</p> | <p>Depression treatment by physicians of any specialty, including primary care and psychiatry</p>      | <p>For adults:</p> <p>--SSRI</p> <p>--TCA, escitalopram or venlafaxine more effective in severe depression</p> <p>For children &amp; adolescents:</p>                                                                                                            | <p>For adults:</p> <p>--CBT or behavior therapy/activity scheduling</p> <p>--IPT</p> <p>For children &amp; adolescents:</p>                                                 | <p>Anderson IM, Ferrier IN, Baldwin RC, Cowen PJ, Howard L, Lewis G, Matthews K, McAllister-Williams RH, Peveler RC, Scott J, Tylee A. <a href="#">Evidence-based guidelines for treating depressive disorders with antidepressants: a revision of the 2000 British Association for Psychopharmacology guidelines.</a> J Psychopharmacol 2008 Jun;22(4):343-96. Epub 2008 Apr 15.</p> |

|                                                                             |                                  |                                                    |                                                                                                      |                                                                                                                                                                                                                                                                                 |                                                                                                               |                                                                                                                                                                                                                                                                                                                                                                                                                                                                                                                                                                                                                                  |
|-----------------------------------------------------------------------------|----------------------------------|----------------------------------------------------|------------------------------------------------------------------------------------------------------|---------------------------------------------------------------------------------------------------------------------------------------------------------------------------------------------------------------------------------------------------------------------------------|---------------------------------------------------------------------------------------------------------------|----------------------------------------------------------------------------------------------------------------------------------------------------------------------------------------------------------------------------------------------------------------------------------------------------------------------------------------------------------------------------------------------------------------------------------------------------------------------------------------------------------------------------------------------------------------------------------------------------------------------------------|
|                                                                             |                                  |                                                    |                                                                                                      | For comorbid medical illness:<br><br>Consider drug-drug interactions, adverse effects                                                                                                                                                                                           | --CBT if no response to structured supportive treatment                                                       |                                                                                                                                                                                                                                                                                                                                                                                                                                                                                                                                                                                                                                  |
| <b>Beyondblue adolescent &amp; young adult depression (Australia, 2011)</b> | MDD, dysthymia, bipolar disorder | Adolescents (age 13-18) & young adults (age 19-24) | Diverse health care settings                                                                         | For moderate or severe MDD:<br><br>The SSRI fluoxetine, used with CBT or IPT<br><br>--Australian Adverse Drug Reactions Advisory Committee (ADRAC) advises that the SSRIs fluoxetine, fluvoxamine and sertraline are approved in this age group for OCD but not for depression. | For dysthymia:<br><br>--Nondirective support<br><br>--Group CBT/IPT<br><br>For MDD:<br><br>--CBT<br><br>--IPT | McDermott B, Baigent M, Chanen A, Graetz B, Hayman N, Newman L, Parikh N, Peirce B, Proimos J, Smalley T, Spence S; beyondblue Expert Working Committee. Clinical practice guidelines: depression in adolescents and young adults. Melbourne: beyondblue: the national depression initiative; 2011 Feb. bspg.com.au Guideline approved by the Australian Government National Health and Medical Research Council.                                                                                                                                                                                                                |
| <b>CANMAT MDD in adults (Canada, 2009)</b>                                  | MDD                              | Adults; also children & adolescents                | Primarily treatment by psychiatrists and other mental health specialists; also primary care settings | For adults, select from wide variety of first line agents based on clinical situation:<br><br>--SSRI<br><br>--SNRI<br><br>--"Newer" agents including agomelatine, bupropion, mianserin, mirtazapine, moclobemide, reboxetine, tianeptine                                        | --CBT<br><br>--IPT                                                                                            | Kennedy SH, Lam RW, Parikh SV, Patten SB, Ravindran AV. <a href="#">Canadian Network for Mood and Anxiety Treatments (CANMAT) clinical guidelines for the management of major depressive disorder in adults. Introduction.</a> J Affect Disord. 2009 Oct;117 Suppl 1:S1-2. Epub 2009 Aug 13.<br><br>Parikh SV, Segal ZV, Grigoriadis S, Ravindran AV, Kennedy SH, Lam RW, Patten SB. <a href="#">Canadian Network for Mood and Anxiety Treatments (CANMAT) clinical guidelines for the management of major depressive disorder in adults. II. Psychotherapy alone or in combination with antidepressant medication.</a> J Affect |

|                                                                                    |                                 |                                                                                                                                                  |                                                                  |                                                                                                                                                                                                                                                                                                                                                                                                                          |                                                            |                                                                                                                                                                                                                                                                                                                                                                                                                                                                                                                                                                                                                                                                                                                  |
|------------------------------------------------------------------------------------|---------------------------------|--------------------------------------------------------------------------------------------------------------------------------------------------|------------------------------------------------------------------|--------------------------------------------------------------------------------------------------------------------------------------------------------------------------------------------------------------------------------------------------------------------------------------------------------------------------------------------------------------------------------------------------------------------------|------------------------------------------------------------|------------------------------------------------------------------------------------------------------------------------------------------------------------------------------------------------------------------------------------------------------------------------------------------------------------------------------------------------------------------------------------------------------------------------------------------------------------------------------------------------------------------------------------------------------------------------------------------------------------------------------------------------------------------------------------------------------------------|
|                                                                                    |                                 |                                                                                                                                                  |                                                                  | <p>--Superior efficacy for escitalopram, sertraline, venlafaxine</p> <p>--Superior tolerability for escitalopram, sertraline</p> <p>--Weight gain with mirtazapine, paroxetine</p> <p>--Fewest drug-drug interactions with citalopram, desvenlafaxine, escitalopram, mirtazapine, venlafaxine</p> <p>For children &amp; adolescents:</p> <p>--The SSRIs fluoxetine and citalopram are first line (combined with CBT)</p> |                                                            | <p>Disord 2009 Oct;117 Suppl 1:S15-25. Epub 2009 Aug 13.</p> <p><a href="#">Lam RW</a>, <a href="#">Kennedy SH</a>, <a href="#">Grigoriadis S</a>, <a href="#">McIntyre RS</a>, <a href="#">Milev R</a>, <a href="#">Ramasubbu R</a>, <a href="#">Parikh SV</a>, <a href="#">Patten SB</a>, <a href="#">Ravindran AV</a>. Canadian Network for Mood and Anxiety Treatments (CANMAT) clinical guidelines for the management of major depressive disorder in adults. III. Pharmacotherapy. <a href="#">J Affect Disord</a> 2009 Oct;117 Suppl 1:S26-43. Epub 2009 Aug 11.</p>                                                                                                                                      |
| <p><b>CANMAT mood disorders and comorbid medical conditions (Canada, 2012)</b></p> | <p>Depressive symptoms, MDD</p> | <p>Medically ill populations; focus on cardiovascular disease, cancer, HIV/hepatitis C, migraine, multiple sclerosis, epilepsy, osteoporosis</p> | <p>Specialized medical clinics; multidisciplinary care teams</p> | <p>--Level of evidence differs by specific medical disorder</p> <p>--When evidence in specific medical disorder is limited, consult general treatment guidelines</p> <p>--Consider drug-drug interactions and drug-illness interactions</p> <p>--Of the SSRIs, citalopram, escitalopram, and sertraline</p>                                                                                                              | <p>--CPT</p> <p>--IPT</p> <p>--Problem solving therapy</p> | <p>Ramasubbu R, Beaulieu S, Taylor VH, Schaffer A, McIntyre RS; Canadian Network for Mood and Anxiety Treatments (CANMAT) Task Force. <a href="#">The CANMAT task force recommendations for the management of patients with mood disorders and comorbid medical conditions: diagnostic, assessment, and treatment principles</a>. <i>Ann Clin Psychiatry</i>. 2012 Feb;24(1):82-90.</p> <p>Ramasubbu R, Taylor VH, Samaan Z, Sockalingham S, Li M, Patten S, Rodin G, Schaffer A, Beaulieu S, McIntyre RS; Canadian Network for Mood and Anxiety Treatments (CANMAT) Task Force. <a href="#">The Canadian Network for Mood and Anxiety Treatments (CANMAT) task force recommendations for the management</a></p> |

|                                                                                |                                                                                                                                                                    |                                                   |                                                        |                                                                                                                                       |                                                                                                                              |                                                                                                                                                                                                                                                                                                                                                                                                                                                                                     |
|--------------------------------------------------------------------------------|--------------------------------------------------------------------------------------------------------------------------------------------------------------------|---------------------------------------------------|--------------------------------------------------------|---------------------------------------------------------------------------------------------------------------------------------------|------------------------------------------------------------------------------------------------------------------------------|-------------------------------------------------------------------------------------------------------------------------------------------------------------------------------------------------------------------------------------------------------------------------------------------------------------------------------------------------------------------------------------------------------------------------------------------------------------------------------------|
|                                                                                |                                                                                                                                                                    |                                                   |                                                        | <p>have fewer drug-drug interactions</p> <p>--Supplement vitamin D and consider bone density monitoring when SSRI use &gt;2 years</p> |                                                                                                                              | <p><a href="#">of patients with mood disorders and select comorbid medical conditions</a>. Ann Clin Psychiatry. 2012 Feb;24(1):91-109.</p>                                                                                                                                                                                                                                                                                                                                          |
| <p><b>GLAD-PC adolescent depression primary care (US and Canada, 2007)</b></p> | <p>For psychological intervention:</p> <p>MDD, depression not otherwise specified, dysthymic disorder, subthreshold symptoms</p> <p>For medication:</p> <p>MDD</p> | <p>Adolescents &amp; young adults (age 10-21)</p> | <p>Primary care</p>                                    | <p>--SSRI</p>                                                                                                                         | <p>For mild cases:</p> <p>--Active support and monitoring</p> <p>For moderate to severe cases:</p> <p>--CBT</p> <p>--ITP</p> | <p>Cheung AH, Zuckerbrot RA, Jensen PS, Ghalib K, Laraque D, Stein REK, and the GLAD-PC Steering Group. Guidelines for Adolescent Depression in Primary Care (GLAD-PC): II. Treatment and Ongoing Management. Pediatrics 2007; 120(5)e1313-e1326.</p> <p>Zuckerbrot RA, Cheung AH, Jensen PS, Stein REK, Laraque D. Guidelines for Adolescent Depression in Primary Care (GLAD-PC): I. Identification, Assessment, and Initial Management. Pediatrics 2007; 120(5) e1299-e1312.</p> |
| <p><b>NICE depression in adults (UK, 2009)</b></p>                             | <p>MDD, or persistent sub-threshold MDD/dysthymia</p>                                                                                                              | <p>Adults (age 18+)</p>                           | <p>Primary and secondary care (stepped care model)</p> | <p>--SSRI</p>                                                                                                                         | <p>--CBT or IPT</p> <p>--Behavioral activation (less evidence)</p> <p>--Couples therapy when appropriate</p>                 | <p>National Collaborating Centre For Mental Health (UK). Treatment and Management of Depression in Adults. Leicester (UK): National Institute for Health and Care Excellence (NICE); 2009 (Clinical guideline; no. 90)</p>                                                                                                                                                                                                                                                          |

|                                                                                  |                                                                                      |                                               |                                                                                                    |                                                                                                                                                                                              |                                                                                                                                                                  |                                                                                                                                                                                                                                                                                                                                                                                   |
|----------------------------------------------------------------------------------|--------------------------------------------------------------------------------------|-----------------------------------------------|----------------------------------------------------------------------------------------------------|----------------------------------------------------------------------------------------------------------------------------------------------------------------------------------------------|------------------------------------------------------------------------------------------------------------------------------------------------------------------|-----------------------------------------------------------------------------------------------------------------------------------------------------------------------------------------------------------------------------------------------------------------------------------------------------------------------------------------------------------------------------------|
| <b>NICE depression in adults with chronic physical health problem (UK, 2009)</b> | MDD, or persistent subthreshold MDD (dysthymia)                                      | Adults (age 18+)                              | chronic physical illness (stepped care model)                                                      | --SSRI, especially citalopram or sertraline (fewer drug-drug interactions)                                                                                                                   | --CBT<br>--Couples therapy when appropriate                                                                                                                      | National Collaborating Centre for Mental Health. Depression in adults with a chronic physical health problem. Treatment and management. London (UK): National Institute for Health and Clinical Excellence (NICE); 2009 Oct. (Clinical guideline; no. 91).                                                                                                                        |
| <b>NICE pediatric depression (UK, 2005)</b>                                      | Mild depression or dysthymia;<br>Moderate to severe depression; psychotic depression | Children (age 5-11) & adolescents (age 12-17) | Primary care, community care, secondary care settings                                              | --The SSRI fluoxetine for moderate to severe depression unresponsive to psychological interventions<br><br>--The SSRIs sertraline or citalopram are second line agents for severe depression | --Supportive therapy, group CBT or guided self-help first line for mild symptoms<br><br>--CBT, IPT, or family therapy first line for moderate to severe symptoms | National Institute for Health and Care Excellence (NICE). Depression in children and young people: identification and management in primary, community, and secondary care. NICE; 2005 Sept. Guidance.nice.org.uk/cg28. (Clinical guideline; no. 28)                                                                                                                              |
| <b>Spanish National Health System MDD in adults (Spain, 2008)</b>                | MDD                                                                                  | Adults (age 18+)                              | Primary and specialized care                                                                       | --SSRI                                                                                                                                                                                       | --CBT<br><br>--IPT as alternative<br><br>--Problem-solving or supportive counseling in mild cases<br><br>--Couples or family therapy when appropriate            | Working Group on the Management of Major Depression in Adults. Clinical Practice Guideline on the Management of Major Depression in Adults. Madrid: National Plan for the SHN of the MHCA. Agencia de Avaluacion de Tecnoloxias Sanitarias de Galicia (avalia-t); 2008. Clinical Practice Guidelines in the Spanish SHN: avalia-t no 2006/06.                                     |
| <b>Spanish National Health System MDD in children &amp; adolescents</b>          | MDD                                                                                  | Children (age 5-11) & Adolescents (age 12-18) | Primary care and specialty child & adolescent mental health care in Spanish National Health System | For moderate to severe MDD:<br><br>--SSRI: Fluoxetine has most evidence and the only approval of Spanish Agency of Medicines and Medical                                                     | For mild to moderate MDD in adolescents:<br><br>--CBT<br><br>--Family therapy                                                                                    | Working group of the clinical practice guideline on the Management of Major Depression in Childhood and Adolescence. Clinical practice guideline on major depression in childhood and adolescence. Quality Plan for the National Health System of the Ministry of Health and Social Policy. Agencia de Avaluacion de Tecnoloxias Sanitarias de Galicia (avalia-t); 2009. Clinical |

|                                                    |                                                |                                               |              |                                                                                                                                                                                                                                            |                                                                                                                          |                                                                                                                                                                                                                                                                                                                                                                                                                                                                                                                                                                                                                                                                                                                                       |
|----------------------------------------------------|------------------------------------------------|-----------------------------------------------|--------------|--------------------------------------------------------------------------------------------------------------------------------------------------------------------------------------------------------------------------------------------|--------------------------------------------------------------------------------------------------------------------------|---------------------------------------------------------------------------------------------------------------------------------------------------------------------------------------------------------------------------------------------------------------------------------------------------------------------------------------------------------------------------------------------------------------------------------------------------------------------------------------------------------------------------------------------------------------------------------------------------------------------------------------------------------------------------------------------------------------------------------------|
| <b>(Spain, 2009)</b>                               |                                                |                                               |              | <p>Devices for pediatric depression</p> <p>--Sertraline, citalopram and escitalopram are first line alternatives based on clinical situation including family history</p>                                                                  | <p>--IPT</p> <p>For severe MDD in adolescents:</p> <p>--CBT</p> <p>In children:</p> <p>--CBT</p> <p>--Family therapy</p> | <p>Practice Guidelines in the SNS: avalia-t no. 2007/09.<br/>www.seguras.es/docs/Avalia-t</p>                                                                                                                                                                                                                                                                                                                                                                                                                                                                                                                                                                                                                                         |
| <b>USPTF adult depression screening (US, 2009)</b> | MDD, dysthymia, minor depression (non-bipolar) | Adults                                        | Primary care | <p>--If using medication, consider selecting antidepressant other than SSRI for age 18-29 (increased risk for not-fatal suicidal behavior, highest with paroxetine) or over age 70 (increased risk of upper gastrointestinal bleeding)</p> | <p>--Options include CBT or brief psychosocial counseling</p>                                                            | <p>US Preventive Services Task Force. Screening for depression in adults: US Preventive Services Task Force recommendation statement. Ann Intern Med 2009;151:784-792.</p> <p>O'Connor EA, Whitlock EP, Beil TL, Gaynes BN. Screening for depression in adult patients in primary care settings: a systematic evidence review. Ann Intern Med 2009;151:793-803.</p> <p>O'Connor EA, Whitlock EP, Gaynes B, Beil TL. Screening for Depression in Adults and Older Adults in Primary Care: An Updated Systematic Review [Internet]. Rockville MD: Agency for Healthcare Research and Quality (US); 2009 Dec. Report No.: 10-05143-EF-1. US Preventive Services Task Force Evidence Syntheses, formerly Systematic Evidence Reviews.</p> |
| <b>USPTF pediatric depression (US, 2009)</b>       | MDD                                            | Children (age 7-11) & adolescents (age 12-18) | Primary care | <p>For adolescents:</p> <p>SSRI (fluoxetine, citalopram, paroxetine, escitalopram, sertraline)</p>                                                                                                                                         | <p>For adolescents:</p> <p>--CBT</p> <p>--IPT</p>                                                                        | <p>US Preventive Services Task Force. Screening and treatment for major depressive disorder in children and adolescents: US Preventive Services Task Force recommendation statement. Pediatrics 2009; 123: 1223-1228.</p> <p>Williams SB, O'Connor EA, Eder M,</p>                                                                                                                                                                                                                                                                                                                                                                                                                                                                    |

|                                                        |                                                     |                                                                 |                                                           |                                                                                                                                                                                                                                                                                               |                                                                                                                                  |                                                                                                                                                                                                                                                                                                                                                                                                                 |
|--------------------------------------------------------|-----------------------------------------------------|-----------------------------------------------------------------|-----------------------------------------------------------|-----------------------------------------------------------------------------------------------------------------------------------------------------------------------------------------------------------------------------------------------------------------------------------------------|----------------------------------------------------------------------------------------------------------------------------------|-----------------------------------------------------------------------------------------------------------------------------------------------------------------------------------------------------------------------------------------------------------------------------------------------------------------------------------------------------------------------------------------------------------------|
|                                                        |                                                     |                                                                 |                                                           | For children:<br>The SSRI fluoxetine                                                                                                                                                                                                                                                          | For children:<br>Inadequate evidence                                                                                             | Whitlock EP. Screening for child and adolescent depression in primary care settings: a systematic evidence review for the US Preventive Services Task Force. Pediatrics 2009;123:e716-735.                                                                                                                                                                                                                      |
| <b>VA/DoD MDD (US, 2009)</b>                           | MDD                                                 | Adults                                                          | Primary care providers and other healthcare professionals | --SSRI except fluvoxamine<br><br>--SNRI<br><br>--bupropion<br><br>--mirtazapine<br><br>Preferred in primary care:<br><br>--SSRI (except fluvoxamine) or the SNRI venlafaxine                                                                                                                  | --CBT<br><br>--IPT<br><br>--Problem solving therapy<br><br>--Couples/marital-focused therapy first line if relationship distress | The Management of MDD Working Group. VA/DoD clinical practice guidelines for management of major depressive disorder (MDD). Department of Veterans Affairs, Department of Defense 2008; Version 2.0: 1-203.                                                                                                                                                                                                     |
| <b>WFSBP unipolar depression (international, 2013)</b> | MDD, moderate to severe unipolar depressive episode | Primarily adults;<br><br>also elderly, comorbid medical illness | Biological treatment by physician of any specialty        | --SSRI<br><br>--SNRI<br><br>--“Newer” antidepressants including mirtazapine, agomelatine, bupropion but not reboxetine<br><br>--TCA also a first-line option for severe depression<br><br><br>--Consider drug-drug interactions<br><br>--Treat underlying medical illness first when possible | --CBT<br><br>--IPT<br><br>--Alternative: training non-specialists in problem-solving therapy                                     | Bauer M, Pfennig A, Severus E, Whybrow PC, Angst J, Moller HJ on behalf of the Task Force on Unipolar Depressive Disorders. World Federation of Societies of Biological Psychiatry (WFSBP) Guidelines for Biological Treatment of Unipolar Depressive disorders, Part 1: Update 2013 on the acute and continuation treatment of unipolar depressive disorders. World J Biol Psychiatry 2013 Jul; 14(5): 334-85. |



\*Inclusion criteria: English-language guidelines issued between 2005-2014 by national governments or national/international medical professional associations addressing psychopharmacologic and/or psychotherapeutic intervention for unipolar depressive disorders in children, adolescents, and/or adults in the general population or with chronic medical illness were included. Guidelines issued by regional governments or other organizations (ex: Texas Medication Algorithm Project, Institute for Clinical Systems Improvement) were excluded. Guidelines focusing solely on bipolar depression were excluded. Guidelines addressing the treatment of depression in individuals with a specific medical illness other than CF (ex: cancer, HIV) were excluded. No previous guidelines focusing on the treatment of depression in individuals with CF were identified.

CBT: Cognitive behavioral therapy

ER: Extended release

IPT: Interpersonal therapy

MDD: Major depressive disorder

SNRI: Serotonin norepinephrine reuptake inhibitor

SSRI: Selective serotonin reuptake inhibitor

TCA: Tricyclic antidepressant

Table 2. English-Language National/International Guidelines for the Treatment of Anxiety\*

| Guideline<br>(Country,<br>year)                                    | Anxiety<br>Subtypes                    | Age Groups             | Settings/<br>Special<br>Population       | First-line medications<br>when pharmacologic<br>intervention is needed | Psychological<br>Interventions                                                                                  | Reference                                                                                                                                                                                                                                                                                                |
|--------------------------------------------------------------------|----------------------------------------|------------------------|------------------------------------------|------------------------------------------------------------------------|-----------------------------------------------------------------------------------------------------------------|----------------------------------------------------------------------------------------------------------------------------------------------------------------------------------------------------------------------------------------------------------------------------------------------------------|
| <b>AACAP anxiety<br/>(US, 2007)</b>                                | All anxiety disorders except OCD, PTSD | Children & adolescents | Psychiatric care in unspecified settings | SSRI                                                                   | --Exposure-based CBT<br><br>--Psychodynamic psychotherapy (less evidence)<br><br>--Parent-child, family therapy | Connolly S, Bernstein G, and the Work Group on Quality Issues, American Academy of Child and Adolescent Psychiatry. Practice Parameter for the Assessment and Treatment of Children and Adolescents with Anxiety Disorders. J Am Acad Child Adolesc Psychiatry 2007; 46(2): 267-283.                     |
| <b>AACAP Psychiatric Management of physically ill children and</b> | Anxiety as a non-categorical           | Children & adolescents | Physical illness                         | Options include:<br><br>--Benzodiazepine<br><br>--Antidepressant       | Options include:<br><br>--Supportive therapy<br><br>--Narrative therapy                                         | DeMaso DR, Martini DR, Cahen LA, and the Work Group on Quality Issues (WGQI), American Academy of Child and Adolescent Psychiatry. Practice Parameter for the Psychiatric Assessment and Management of Physically Ill Children and Adolescents. J Am Acad Child Adolesc Psychiatry 2009; 48(2): 213-233. |

|                                                        |                                                                                |                                                          |                                                                                         |                                                                                                                                                                                                                                                                                       |                                                                                                                                                                            |                                                                                                                                                                                                                                                            |
|--------------------------------------------------------|--------------------------------------------------------------------------------|----------------------------------------------------------|-----------------------------------------------------------------------------------------|---------------------------------------------------------------------------------------------------------------------------------------------------------------------------------------------------------------------------------------------------------------------------------------|----------------------------------------------------------------------------------------------------------------------------------------------------------------------------|------------------------------------------------------------------------------------------------------------------------------------------------------------------------------------------------------------------------------------------------------------|
| <p><b>adolescents (US, 2009)</b></p>                   | <p>target symptom</p>                                                          |                                                          |                                                                                         | <p>--Buspirone<br/>--Gabapentin<br/>--Clonidine<br/>Medication selection and dosing should consider pharmacokinetics, pharmacodynamics, organ systems affected by medical illness</p>                                                                                                 | <p>--CBT<br/>--Behavior modification<br/>--Coping skills and play strategies for procedures<br/>--Group therapy<br/>--Family therapy<br/>--Address symptoms in parents</p> |                                                                                                                                                                                                                                                            |
| <p><b>AACAP psychotropic medication (US, 2009)</b></p> | <p>Anxiety disorders including separation anxiety, social phobia, GAD; OCD</p> | <p>Children &amp; adolescents</p>                        | <p>Prescription of medication to children &amp; adolescents in unspecified settings</p> | <p>--SSRI for OCD<br/>--SSRI often used "off label" for non-OCD anxiety disorders<br/><br/>Before prescribing medication:<br/><br/>Psychiatric evaluation, medical history, collaboration between health care providers, ensure availability of follow up, consent/assent process</p> | <p>--CBT or combined medication plus CBT is first line for OCD</p>                                                                                                         | <p>Walkup J, and the Work Group on Quality Issues, American Academy of Child and Adolescent Psychiatry. Practice Parameter on the Use of Psychotropic Medication in Children and Adolescents. J Am Acad Child Adolesc Psychiatry; 2009; 48(9): 961-73.</p> |
| <p><b>APA panic (US, 2010)</b></p>                     | <p>Panic disorder</p>                                                          | <p>Primarily adults; also children &amp; adolescents</p> | <p>Psychiatric care setting<br/>--Adapt therapies to account for</p>                    | <p>--SSRI preferred, especially for adolescents<br/>--SNRI (venlafaxine ER)<br/>--TCA effective but more side effects</p>                                                                                                                                                             | <p>--CBT<br/>--Panic-focused psychodynamic psychotherapy in some cases</p>                                                                                                 | <p>Stein M, Goin M, Pollack M, Roy-Byrne P, Sareen J, Simon N, Campbell-Sills L. American Psychiatric Association Practice Guideline: Treatment of Patients with Panic Disorder. Second Edition. American Psychiatric Association. 2010.</p>               |

|                                            |                                                                                                                        |                                                                                           |                                                |                                                                                                                                                                                                                                                                                                                                        |                                                                                        |                                                                                                                                                                                                                                                                                                                                                                                                                                                                                                                 |
|--------------------------------------------|------------------------------------------------------------------------------------------------------------------------|-------------------------------------------------------------------------------------------|------------------------------------------------|----------------------------------------------------------------------------------------------------------------------------------------------------------------------------------------------------------------------------------------------------------------------------------------------------------------------------------------|----------------------------------------------------------------------------------------|-----------------------------------------------------------------------------------------------------------------------------------------------------------------------------------------------------------------------------------------------------------------------------------------------------------------------------------------------------------------------------------------------------------------------------------------------------------------------------------------------------------------|
|                                            |                                                                                                                        |                                                                                           | any comorbid physical illness                  | -Benzodiazepines (alprazolam, clonazepam, diazepam, lorazepam) preferred when rapid symptom control needed                                                                                                                                                                                                                             | --Couples or family therapy when appropriate (not as monotherapy)                      |                                                                                                                                                                                                                                                                                                                                                                                                                                                                                                                 |
| <b>BAP anxiety (UK, 2014)</b>              | GAD, panic disorder, specific phobia, social anxiety disorder, PTSD, OCD, Separation anxiety, illness anxiety disorder | Primarily adults (age 18-65); also children & adolescents, elderly/medically ill patients | Primary, secondary, and tertiary care settings | For adults:<br>--SSRI<br>Fluoxetine and paroxetine more likely to have drug interactions in medically ill patients<br>--Benzodiazepines first line only for short-term use<br><br>For children and adolescents:<br>--SSRI, fluoxetine may be preferable<br><br>--Consider reserving medication for second-line use after psychotherapy | --Exposure therapy, CBT<br><br>--Psychodynamic psychotherapy (less evidence)           | Baldwin DS, Anderson IM, Nutt DJ, Allgulander C, Bandelow B, den Boer JA, Christmas DM, Davies S, Fineberg N, Lidbetter N, Malizia A, McCrone P, Nabarro D, O'Neill C, Scott J, van der Wee N, Wittchen HU. <a href="#">Evidence-based pharmacological treatment of anxiety disorders, post-traumatic stress disorder and obsessive-compulsive disorder: a revision of the 2005 guidelines from the British Association for Psychopharmacology</a> . J Psychopharmacol. 2014 May;28(5):403-39. Epub 2014 Apr 8. |
| <b>BAP/RCP benzo-diazepines (UK, 2013)</b> | GAD, panic disorder, social anxiety disorder, OCD, PTSD                                                                | Unspecified; includes elderly and medically ill patients                                  | Unspecified clinical care settings             | --Benzodiazepines are first line for short term use (up to 4 weeks) or severe anxiety<br><br>--Consider benzodiazepines for long term use in panic disorder, social anxiety disorder, or GAD when SSRI, SNRI, and/or pregabalin are                                                                                                    | --Consider psychological interventions (ex: CBT) as alternatives to benzodiazepine use | Baldwin DS, Aitchison K, Bateson A, Curran HV, Davies S, Leonard B, Nutt DJ, Stephens DN, Wilson S. Benzodiazepines: risks and benefits. A reconsideration. J Psychopharmacol 2013 Nov;27(11):967-71. Epub 2013 Sep 24.<br><br>--A joint guideline of the British Association for Psychopharmacology and the Psychopharmacology Special Interest Group of the Royal College of Psychiatrists                                                                                                                    |

|                                           |                                                                                              |                                                                           |                                                                    |                                                                                                                                                                                                                                                                                                                                                                                                                                         |                                                                                                                                                                                                                                                                                                                                                                    |                                                                                                                                                                                                                                                                                                                                                                                                                                                                                  |
|-------------------------------------------|----------------------------------------------------------------------------------------------|---------------------------------------------------------------------------|--------------------------------------------------------------------|-----------------------------------------------------------------------------------------------------------------------------------------------------------------------------------------------------------------------------------------------------------------------------------------------------------------------------------------------------------------------------------------------------------------------------------------|--------------------------------------------------------------------------------------------------------------------------------------------------------------------------------------------------------------------------------------------------------------------------------------------------------------------------------------------------------------------|----------------------------------------------------------------------------------------------------------------------------------------------------------------------------------------------------------------------------------------------------------------------------------------------------------------------------------------------------------------------------------------------------------------------------------------------------------------------------------|
|                                           |                                                                                              |                                                                           |                                                                    | <p>ineffective or contraindicated due to medical comorbidities</p> <p>--Not for use in OCD, PTSD</p>                                                                                                                                                                                                                                                                                                                                    |                                                                                                                                                                                                                                                                                                                                                                    |                                                                                                                                                                                                                                                                                                                                                                                                                                                                                  |
| <p><b>ADAC anxiety (Canada, 2014)</b></p> | <p>Panic disorder, agoraphobia, specific phobia, social anxiety disorder, GAD, OCD, PTSD</p> | <p>Adults; children &amp; adolescents or elderly; comorbid conditions</p> | <p>Primary care, psychiatric care, multidisciplinary care team</p> | <p>For adults:</p> <p>--SSRI for most anxiety disorders</p> <p>--SNRI for most anxiety disorders, not first line for OCD</p> <p>--Also pregabalin for social anxiety disorder, GAD</p> <p>--Also agomelatine for GAD</p> <p>--Benzodiazepines for short term use during acute crises or antidepressant treatment initiation</p> <p>--Medications less useful for specific phobia</p> <p>For children &amp; adolescents:</p> <p>SSRI</p> | <p>--Exposure-based CBT, mindfulness-based cognitive therapy, or other forms of CBT first line for most anxiety disorders</p> <p>--IPT an alternative for social anxiety (less effective)</p> <p>--ACT an alternative for OCD (less evidence)</p> <p>--EMDR or DBT alternatives for PTSD</p> <p>--Include parent/family component for children and adolescents</p> | <p><a href="#">Katzman MA, Bleau P, Blier P, Chokka P, Kjernisted K, Van Ameringen M; Canadian Anxiety Guidelines Initiative Group on behalf of the Anxiety Disorders Association of Canada/Association Canadienne des troubles anxieux and McGill University.</a></p> <p>Canadian clinical practice guidelines for the management of anxiety, posttraumatic stress and obsessive-compulsive disorders. <a href="#">BMC Psychiatry.</a> 2014;14 Suppl 1:S1. Epub 2014 Jul 2.</p> |
| <p><b>CPA anxiety (Canada, 2006)</b></p>  | <p>Panic disorder, agoraphobia,</p>                                                          | <p>Adults; children &amp; adolescents</p>                                 | <p>Primary care, psychiatric care</p>                              | <p>For adults:</p>                                                                                                                                                                                                                                                                                                                                                                                                                      | <p>--CBT</p>                                                                                                                                                                                                                                                                                                                                                       | <p>Swinson RP, Antony MM, Bleau P, Chokka P, Craven M, Fallu A, Katzman M, Kjernisted K, Lanius R, Manassis K, McIntosh D, Plamondon J, Rabheru K, Van Ameringen M, Walker JR. Canadian Psychiatric</p>                                                                                                                                                                                                                                                                          |

|                                               |                                                                  |                                                        |                                                         |                                                                                                                                                                                                                                                           |                                                                                                                                                                       |                                                                                                                                                                                                                                                                                                                                                                    |
|-----------------------------------------------|------------------------------------------------------------------|--------------------------------------------------------|---------------------------------------------------------|-----------------------------------------------------------------------------------------------------------------------------------------------------------------------------------------------------------------------------------------------------------|-----------------------------------------------------------------------------------------------------------------------------------------------------------------------|--------------------------------------------------------------------------------------------------------------------------------------------------------------------------------------------------------------------------------------------------------------------------------------------------------------------------------------------------------------------|
|                                               | phobia, specific phobia, social anxiety disorder, OCD, GAD, PTSD |                                                        |                                                         | --SSRI for most anxiety disorders (less data for specific phobia)<br><br>--SNRI venlafaxine ER a first-line alternative for panic, GAD, social anxiety, PTSD<br><br>--Benzodiazepines for short term use<br><br>For children & adolescents:<br><br>--SSRI |                                                                                                                                                                       | Association. Clinical Practice Guidelines: Management of Anxiety Disorders. Can J Psychiatry, 2006, 51; Suppl 2.                                                                                                                                                                                                                                                   |
| <b>NICE anxiety in adults (UK, 2011)</b>      | GAD, panic disorder                                              | Adults (age 18+)                                       | Primary, secondary, community care (stepped care model) | --SSRI, especially sertraline due to low cost<br><br>--Benzodiazepine acceptable only for short term crisis                                                                                                                                               | CBT or applied relaxation                                                                                                                                             | National Collaborating Centre for Mental Health, National Collaborating Centre for Primary Care. Generalised anxiety disorder and panic disorder (with or without agoraphobia) in adults. Management in primary, secondary and community care. London (UK): National Institute for Health and Clinical Excellence (NICE); 2011 Jan. (Clinical guideline; no. 113). |
| <b>NICE social anxiety (UK, 2013)</b>         | Social anxiety disorder                                          | Adults (age 18+);<br>Children & adolescents (age 5-17) | Primary and secondary care, educational settings        | For adults only:<br><br>--SSRI (escitalopram or sertraline)                                                                                                                                                                                               | --CBT; parent involvement for pediatric patients<br><br>--Short term psychodynamic psychotherapy for social phobia is a less effective alternative, for ages 15+ only | National Collaborating Centre for Mental Health. Social anxiety disorder: recognition, assessment and treatment. London (UK): National Institute for Health and Care Excellence (NICE); 2013 May. (Clinical guideline; no. 159).                                                                                                                                   |
| <b>Spanish National Health System anxiety</b> | GAD, panic disorder                                              | Adults                                                 | Primary care                                            | --SSRI                                                                                                                                                                                                                                                    | --CBT                                                                                                                                                                 | Guideline Working Group for the Treatment of Patients with Anxiety Disorders in Primary Care. Madrid: National Plan for the NHS of the MSC. Health Technology Assessment unit. Lain Entralgo Agency.                                                                                                                                                               |

|                                                                   |                                                                                              |                                                          |                                                                                         |                                                                                                                                                                                                                                                                                                                                                                                                                                  |                                                                                                                                            |                                                                                                                                                                                                                                                                                                                                                                                                                                                                                                                                                                                                                                                                                                                                                                                                                                                                                                                                                                                     |
|-------------------------------------------------------------------|----------------------------------------------------------------------------------------------|----------------------------------------------------------|-----------------------------------------------------------------------------------------|----------------------------------------------------------------------------------------------------------------------------------------------------------------------------------------------------------------------------------------------------------------------------------------------------------------------------------------------------------------------------------------------------------------------------------|--------------------------------------------------------------------------------------------------------------------------------------------|-------------------------------------------------------------------------------------------------------------------------------------------------------------------------------------------------------------------------------------------------------------------------------------------------------------------------------------------------------------------------------------------------------------------------------------------------------------------------------------------------------------------------------------------------------------------------------------------------------------------------------------------------------------------------------------------------------------------------------------------------------------------------------------------------------------------------------------------------------------------------------------------------------------------------------------------------------------------------------------|
| <p><b>adults in primary care (Spain, 2008)</b></p>                |                                                                                              |                                                          |                                                                                         | <p>--SNRI (venlafaxine ER)<br/> --TCA (chlor)impramine<br/> <br/> --Benzodiazepines mainly for short term use or need for rapid response; alprazolam or lorazepam for acute panic attack</p>                                                                                                                                                                                                                                     | <p>--Other techniques as appropriate</p>                                                                                                   | <p>Community of Madrid; 2008. Clinical Practice Guidelines in the NHS. UETS No. 2006/10.</p>                                                                                                                                                                                                                                                                                                                                                                                                                                                                                                                                                                                                                                                                                                                                                                                                                                                                                        |
| <p><b>WFSBP anxiety in primary care (international, 2012)</b></p> | <p>GAD, panic disorder, agoraphobia, specific phobia, social anxiety disorder, OCD, PTSD</p> | <p>Primarily adults; also children &amp; adolescents</p> | <p>Primary care<br/> <br/> (See Bandelow, 2008, re: complex care in other settings)</p> | <p>For adults:<br/> <br/> --SSRI for most anxiety disorders, OCD, PTSD<br/> <br/> --SNRI for most anxiety disorders or PTSD (but not OCD)<br/> <br/> --Pregabalin for generalized anxiety disorder<br/> <br/> --Benzodiazepines only first line if used short term, during SSRI/SNRI treatment initiation or for a specific stressor<br/> <br/> <br/> For children and adolescents:<br/> <br/> SSRIs with careful monitoring</p> | <p>--All patients require supportive psychotherapy<br/> <br/> --Consider CBT/exposure therapy as alternative or addition to medication</p> | <p>Bandelow B, Sher L, Bunevicius R, Hollander E, Kasper Siegfried, Zohar J, Moller HJ, WFSBP Task Force on Mental Disorders in Primary Care and WFSBP Task Force on Anxiety Disorders, OCD, and PTSD. Guidelines for the pharmacological treatment of anxiety disorders, obsessive-compulsive disorder and posttraumatic stress disorder in primary care. International Journal of Psychiatry in Clinical Practice. World Federation of Societies of Biological Psychiatry Guidelines. 2012. 16; 77-- 84.<br/> <br/> For additional supporting detail, see: Bandelow B, Zohar J, Hollander E, Kasper S, Moller HJ, and WFSBP Task Force on Treatment Guidelines for Anxiety Obsessive-Compulsive Post-Traumatic Stress Disorders. World Federation of Societies of Biological Psychiatry (WFSBP) guidelines for the pharmacological treatment of anxiety, obsessive-compulsive and post-traumatic stress disorders—first revision. World J Biol Psychiatry 2008; 9(4):248-312.</p> |

\*Inclusion criteria: English-language guidelines issued between 2005-2014 by national governments or national/international medical professional associations addressing psychopharmacologic and/or psychotherapeutic intervention for anxiety disorders (primarily GAD, social phobia, and panic disorder) in children, adolescents, and/or adults in the general population or with chronic medical illness were included. Guidelines issued by regional governments or other organizations (ex: Texas Medication Algorithm Project, Institute for Clinical Systems Improvement) were excluded. Guidelines focusing solely on OCD, PTSD, or specific phobia were excluded. Guidelines addressing the treatment of anxiety in individuals with a specific medical illness other than CF (ex: cancer, HIV) were excluded. No previous guidelines focusing on the treatment of anxiety in individuals with CF were identified.

ACT: Acceptance and commitment therapy

CBT: Cognitive behavioral therapy

DBT: Dialectical behavior therapy

EMDR: Eye movement desensitization and reprocessing

ER: Extended release

GAD: Generalized anxiety disorder

OCD: Obsessive compulsive disorder

PTSD: Posttraumatic stress disorder

SNRI: Serotonin norepinephrine reuptake inhibitor

SSRI: Selective serotonin reuptake inhibitor

TCA: tricyclic antidepressant

Table 3. Selected English-Language Textbooks, Reviews and Meta-analyses of Depression or Anxiety Prevention and Intervention

| Year | Depression or Anxiety  | Age Groups | Settings/Special Population | First-line medications when pharmacologic intervention is needed | Psychological Interventions                                                                        | Reference                                                                                                                                                                                                                         |
|------|------------------------|------------|-----------------------------|------------------------------------------------------------------|----------------------------------------------------------------------------------------------------|-----------------------------------------------------------------------------------------------------------------------------------------------------------------------------------------------------------------------------------|
| 2011 | Depression and anxiety | Adults     | Patients with COPD          | n/a                                                              | --Psychological interventions had small effects in reducing anxiety symptoms, but findings unclear | Baraniak A, Sheffield D. The efficacy of psychologically based interventions to improve anxiety, depression and quality of life in COPD: A systematic review and meta-analysis. Patient Education and Counseling 2011; 83: 29-36. |

|            |                       |                                 |                                                                                                                                       |                                                                                                                                                                             |                                                                                                                                                                                 |                                                                                                                                                                                                                                                                                                                                                                                                                                                                      |
|------------|-----------------------|---------------------------------|---------------------------------------------------------------------------------------------------------------------------------------|-----------------------------------------------------------------------------------------------------------------------------------------------------------------------------|---------------------------------------------------------------------------------------------------------------------------------------------------------------------------------|----------------------------------------------------------------------------------------------------------------------------------------------------------------------------------------------------------------------------------------------------------------------------------------------------------------------------------------------------------------------------------------------------------------------------------------------------------------------|
| 2014       | Depression            | Adults                          | Review and meta-analysis; 19 RCTs of psychological intervention and/or psychopharmacologic treatment in individuals with diabetes     | --SSRIs improved depression severity and glycemic control                                                                                                                   | --Psychological interventions improved depression severity<br><br>--Insufficient evidence regarding medical outcomes                                                            | <a href="#">Baumeister H, Hutter N, Bengel J.</a><br>Psychological and pharmacological interventions for depression in patients with diabetes mellitus and depression: an abridged Cochrane review. Diabet Med 2014;31:773-786.                                                                                                                                                                                                                                      |
| 2013, 2014 |                       |                                 | --Review and meta-analysis of QTc prolongation with psychotropic medications                                                          | --Dose-dependent QTc prolongation with SSRIs small (6.1 ms), less than TCA<br><br>--Among SSRIs, more prolongation with citalopram than sertraline, paroxetine, fluvoxamine | n/a                                                                                                                                                                             | Beach SR, Celano CM, Noseworthy PA, Januzzi JL, Huffman JC. QTc prolongation, torsades de pointes, and psychotropic medications. Psychosomatics 2013;54:1-13.<br><br>Beach SR, Kostis WJ, Celano CM, Januzzi JL, Ruskin JN, Noseworthy PA, Huffman JC. <a href="#">Meta-analysis of selective serotonin reuptake inhibitor-associated QTc prolongation.</a> J Clin Psychiatry. 2014 May;75(5):e441-9.                                                                |
| 2014       | Depression            | Adults; children & adolescents; | Review of systematic reviews and meta-analysis in 156 trials, n= 56,158 including general and high risk populations; physical illness | n/a                                                                                                                                                                         | --Psychological and educational interventions effective to prevent depression with small to medium effect sizes<br><br>--Insufficient evidence to compare types of intervention | Bellón JA, Moreno-Peral P, Motrico E, Rodríguez-Morejón A, Fernández A, Serrano-Blanco A, Zabaleta-Del-Olmo E, Conejo-Cerón S. Effectiveness of psychological and/or educational interventions to prevent the onset of episodes of depression: A systematic review of systematic reviews and meta-analyses. Prev Med. 2014 Nov 20. <a href="http://dx.doi.org/10.1016/j.ypmed.2014.11.003">http://dx.doi.org/10.1016/j.ypmed.2014.11.003</a> . [Epub ahead of print] |
| 2005       | Anxiety (unspecified) |                                 | Patients with epilepsy                                                                                                                | --SSRI                                                                                                                                                                      | --CBT                                                                                                                                                                           | Beyenburg S, Mitchell AJ, Schmidt D, Elger CE, Reuber M. Anxiety in patients with epilepsy: Systematic review and suggestions for clinical management. Epilepsy & Behavior 2005;7:161-171.                                                                                                                                                                                                                                                                           |



|      |                        |                     |                                        |                                                                                                         |                                                                                                                                                                                                                                                                                                    |                                                                                                                                                                                                                                                                                  |
|------|------------------------|---------------------|----------------------------------------|---------------------------------------------------------------------------------------------------------|----------------------------------------------------------------------------------------------------------------------------------------------------------------------------------------------------------------------------------------------------------------------------------------------------|----------------------------------------------------------------------------------------------------------------------------------------------------------------------------------------------------------------------------------------------------------------------------------|
| 2012 | Depression and anxiety |                     | Patients with COPD                     | <p>--SSRI for depression and COPD</p> <p>--Antidepressants and benzodiazepines for anxiety and COPD</p> | <p>--CBT for depression and anxiety</p> <p>--Pulmonary rehabilitation is recommended because of improvement in quality of life, reduction in fatigue and dyspnea</p> <p>-More focus on interpersonal psychotherapy, self-management programs because of promising effects in other populations</p> | <p>Cafarella PA, Effing TW, Usmani ZA, Frith PA. Treatments for anxiety and depression in patients with chronic obstructive pulmonary disease: A literature review. <i>Respirology</i> 2012;17:627-638.</p>                                                                      |
| 2009 | Depression and anxiety | Children and adults | Patients with various chronic diseases | <p>--SSRI for depression in patients with cancer</p>                                                    | <p>--CBT for reducing depression and anxiety symptoms in patients with diabetes, heart disease or cancer and in children with asthma</p> <p>--Biofeedback</p> <p>--Relaxation training</p>                                                                                                         | <p>Clarke DM, Currie KC. Depression, anxiety and their relationship with chronic diseases: a review of the epidemiology, risk and treatment evidence. <i>Medical Journal of Australia</i> 2009;190: S54-S60.</p>                                                                 |
| 2011 | Anxiety and depression |                     | Patients with cardiovascular disease   | <p>--SSRI</p>                                                                                           | <p>--CBT for patients with coronary artery and depression, which includes stress management, relaxation training and health education</p> <p>--CBT for patients with anxiety, which includes relaxation techniques and exposure training</p>                                                       | <p>Compare A, Germani E, Proietti R, Janeway D. Clinical psychology and cardiovascular disease: an up-to-date clinical practice review for assessment and treatment of anxiety and depression. <i>Clinical Practice &amp; Epidemiology in Mental Health</i> 2011;7: 148-156.</p> |

|      |                                         |                                   |                                                                                                             |                                                     |                                                                                |                                                                                                                                                                                                                                                                                                                                                                                       |
|------|-----------------------------------------|-----------------------------------|-------------------------------------------------------------------------------------------------------------|-----------------------------------------------------|--------------------------------------------------------------------------------|---------------------------------------------------------------------------------------------------------------------------------------------------------------------------------------------------------------------------------------------------------------------------------------------------------------------------------------------------------------------------------------|
| 1994 | Depression                              |                                   |                                                                                                             | n/a                                                 | --Review of IPT                                                                | Cornes CL, Frank E. Interpersonal psychotherapy for depression. The Clinical Psychologist 1994;47(3), 9-10.                                                                                                                                                                                                                                                                           |
| 2013 | Anxiety and depression                  | Adults                            | Patients with COPD                                                                                          | n/a                                                 | --Exercise training with or without psychological components                   | Coventry PA, Bower P, Keyworth C, Kenning C, Knopp J, Garrett C, et al. The Effect of Complex Interventions on Depression and Anxiety in Chronic Obstructive Pulmonary Disease: Systematic Review and Meta-Analysis. PLoS ONE 2013;8:1-22.                                                                                                                                            |
| 2008 | Mild-to-moderate anxiety and depression | Adults (age 18+)                  | Patients with COPD                                                                                          | n/a                                                 | --Some evidence for CBT in combination with exercise and education             | Coventry PA, Gellatly JL. Improving outcomes for COPD patients with mild-to-moderate anxiety and depression: A systematic review of cognitive behavioural therapy. British Journal of Health Psychology 2008;13: 381-400.                                                                                                                                                             |
| 2014 | MDD                                     | Children & adolescents (age 6-18) | Review and meta-analysis; 11 RCTs of psychotherapy and/or antidepressant treatment in pediatric populations | --Insufficient evidence                             | --Insufficient evidence                                                        | <a href="#">Cox GR</a> , <a href="#">Callahan P</a> , <a href="#">Churchill R</a> , <a href="#">Hunot V</a> , <a href="#">Merry SN</a> , <a href="#">Parker AG</a> , <a href="#">Hetrick SE</a> . Psychological therapies versus antidepressant medication, alone and in combination for depression in children and adolescents. Cochrane Database Syst Rev. 2014 Nov 30;11:CD008324. |
| 2007 | Anxiety and panic                       | Adults                            | Patients with asthma                                                                                        | n/a                                                 | --CBT                                                                          | Deshmukh V M, Toelle BG, Usherwood T, O'Grady B, Jenkins CR. Anxiety, panic and adult asthma: a cognitive-behavioral perspective. Respiratory Medicine 2007;101: 194-202.                                                                                                                                                                                                             |
| 2009 | Anxiety and depression                  | Children & adolescents            | Patients with epilepsy                                                                                      | --SSRI                                              | --CBT<br>--Relaxation techniques<br>--Coping skills for improving self-concept | Ekinci O, Titus JB, Rodopman AA, Berkem M, Trevathan E. Depression and anxiety in children and adolescents with epilepsy: Prevalence, risk factors, and treatment. Epilepsy & Behavior 2009;14: 8-18.                                                                                                                                                                                 |
| 2005 | Mood disorders                          |                                   | Patients with various physical illnesses                                                                    | --SSRI                                              | --CBT                                                                          | Evans DL, Charney DS, Lewis L, Golden RN, Gorman JM, Krishnan KRR, et al. Mood disorders in the medically ill: Scientific review and recommendations. Biological Psychiatry 2005; 58: 175-189.                                                                                                                                                                                        |
| 2015 | Anxiety, depressive syndromes,          | Adults; chapters focusing on      | Textbook of psychiatry in medically ill patients, including chapters on                                     | --Reviews pharmacokinetics in patients with medical | --Reviews psychological interventions in medically ill, including CBT, family  | Fogel B, Greenberg D, eds. Psychiatric Care of the Medical Patient, 3 <sup>rd</sup> Edition.                                                                                                                                                                                                                                                                                          |

|      |                                                      |                        |                                                                  |                                                                                                                                                    |                                                                                                    |                                                                                                                                                                                                           |
|------|------------------------------------------------------|------------------------|------------------------------------------------------------------|----------------------------------------------------------------------------------------------------------------------------------------------------|----------------------------------------------------------------------------------------------------|-----------------------------------------------------------------------------------------------------------------------------------------------------------------------------------------------------------|
|      | other neuro-psychiatric symptoms                     | children & adolescents | pulmonary disease, dyspnea, pain, transplant                     | illness (Mascarenas et al.)                                                                                                                        | therapy, adherence interventions                                                                   | New York: Oxford University Press, 2015 (In press).                                                                                                                                                       |
| 2010 | Anxiety and depression                               | Children               | Patients with diabetes                                           | n/a                                                                                                                                                | --Distraction<br>--Hypnosis<br>--CBT<br>--Operant learning procedures with positive reinforcement  | Fritsch SL, Overton MW, Robbins DR. The interface of child mental health and juvenile diabetes mellitus. <i>Child &amp; Adolescent Psychiatric Clinics of North America</i> 2010; 19: 333-352.            |
| 2011 | Depression                                           |                        | Patients with COPD                                               | --SSRI is preferred<br>--TCA (more side effects)                                                                                                   | --CBT                                                                                              | Fritzsche A, Clamor A, von Leupoldt A. Effects of medical and psychological treatment of depression in patients with COPD—a review. <i>Respiratory Medicine</i> 2011; 105:1422-1433.                      |
| 2014 | Anxiety, depression, other psychiatric disorders     | Children & Adolescents | Textbook of pharmacotherapy in pediatric populations             | --Review of principles of neuropsychopharmacology<br>--Review of risks and benefits of SSRIs, including serotonin syndrome, suicidality, bleeding. | n/a                                                                                                | Gerlach M, Warnke A, Greenhill L. <i>Psychiatric Drugs in Children and Adolescents</i> . New York: Springer-Verlag Wien, 2014.                                                                            |
| 2014 | Anxiety, depression, or other psychological outcomes | All ages               | Review of 16 RCTs in individuals with CF or their family members | n/a                                                                                                                                                | --Insufficient evidence regarding psychological interventions to treat depression or anxiety in CF | Goldbeck L, Fidika A, Herle M, Quittner AL. Psychological interventions for individuals with cystic fibrosis and their families. <i>Cochrane Database of Systematic Reviews</i> . 2014;Art. No.: CD003148 |
| 2013 | Depression                                           |                        | Patients with diabetes                                           | --SSRI                                                                                                                                             | --Stepped care model<br>--CBT                                                                      | Hermanns N, Caputo S, Dzida G, Khunti K, Meneghini LF, Snoek F. Screening, evaluation and management of depression in people with diabetes in primary care. <i>Primary Care Diabetes</i> 2013; 7: 1-10.   |

|      |                        |          |                                                                                                                                                                                                                 |                                                                                |                                                                                                |                                                                                                                                                                                                                                                                                                                                                                                                                                                                                                                                                    |
|------|------------------------|----------|-----------------------------------------------------------------------------------------------------------------------------------------------------------------------------------------------------------------|--------------------------------------------------------------------------------|------------------------------------------------------------------------------------------------|----------------------------------------------------------------------------------------------------------------------------------------------------------------------------------------------------------------------------------------------------------------------------------------------------------------------------------------------------------------------------------------------------------------------------------------------------------------------------------------------------------------------------------------------------|
| 2013 | Depression and Anxiety | All ages | Review of 67 key articles evaluating collaborative care interventions in primary care and specialized medical populations<br><br>--systematic assessment<br><br>--care management<br><br>--stepped care process | --Specific interventions vary by study                                         | --Specific interventions vary by study                                                         | Huffman JC, Niazi SK, Rundell JR, Sharpe M, Katon WJ. <a href="#">Essential articles on collaborative care models for the treatment of psychiatric disorders in medical settings: a publication by the Academy of Psychosomatic Medicine Research and Evidence-Based Practice Committee</a> . Psychosomatics. 2014 Mar-Apr;55(2):109-22. Epub 2013 Dec 25.                                                                                                                                                                                         |
| 2008 | Anxiety and depression | Adults   | Patients with cancer                                                                                                                                                                                            | --n/a                                                                          | --Behavioral interventions<br><br>--Education<br><br>--Counseling<br><br>--Relaxation training | Jacobsen PB, Jim HS. Psychosocial interventions for anxiety and depression in adult cancer patients: achievements and challenges. CA: A Cancer Journal for Clinicians 2008; 58: 214-230.                                                                                                                                                                                                                                                                                                                                                           |
| 2008 | Depression             |          | Patients with coronary heart disease                                                                                                                                                                            | --SSRI                                                                         | --CBT<br><br>--Aerobic exercise and cardiac rehabilitation                                     | Lichtman JH, Bigger JT, Blumenthal JA, Frasure-Smith N, Kaufmann PG, Lesperance F., et al. Depression and coronary heart disease: recommendations for screening, referral, and treatment: a science advisory from the American Heart Association Prevention Committee of the Council on Cardiovascular Nursing, Council on Clinical Cardiology, Council on Epidemiology and Prevention, and Interdisciplinary Council on Quality of Care and Outcomes Research: endorsed by the American Psychiatric Association. Circulation 2008; 118:1768-1775. |
| 2004 | Anxiety and depression |          | Patients with COPD                                                                                                                                                                                              | --SSRI (but poor compliance)<br><br>--Partial 5HT1A-receptor agonist buspirone | --CBT with relaxation exercises, cognitive components and exposure                             | Mikkelsen RL, Middelboe T, Pisinger C, Stage KB. Anxiety and depression in patients with chronic obstructive pulmonary disease (COPD). A review. Nordic Journal of Psychiatry 2004; 58: 65-70.                                                                                                                                                                                                                                                                                                                                                     |

|      |                                                    |                                                 |                                                                               |                                                                                                            |                                                                                                                 |                                                                                                                                                                                                                                                                                                                                                                                                        |
|------|----------------------------------------------------|-------------------------------------------------|-------------------------------------------------------------------------------|------------------------------------------------------------------------------------------------------------|-----------------------------------------------------------------------------------------------------------------|--------------------------------------------------------------------------------------------------------------------------------------------------------------------------------------------------------------------------------------------------------------------------------------------------------------------------------------------------------------------------------------------------------|
| 2012 | Anxiety                                            |                                                 | Review of drug interactions for medications used to treat anxiety             | --Among SSRIs, fluoxetine, fluvoxamine, paroxetine most prone to drug-drug interactions                    | n/a                                                                                                             | Muscattello MR, Spina E, Bandelow B, Baldwin DS. Clinically relevant drug interactions in anxiety disorders. Hum Psychopharmacol Clin Exp 2012; 27:239-253.                                                                                                                                                                                                                                            |
| 2003 | Depression                                         | Adults                                          | Patients with diabetes types 1 and 2                                          | --SNRI and SSRI<br>--TCA (and MAOI)                                                                        | --CBT                                                                                                           | Musselman DL, Betan E, Larsen H, Phillips LS. Relationship of depression to diabetes types 1 and 2: epidemiology, biology, and treatment. Biological Psychiatry 2003; 54: 317-329.                                                                                                                                                                                                                     |
| 2012 | Depression                                         |                                                 | Review of use of antidepressants in patients with renal disease               | --SSRI                                                                                                     | n/a                                                                                                             | <a href="#">Nagler EV</a> , <a href="#">Webster AC</a> , <a href="#">Vanholder R</a> , <a href="#">Zoccali C</a> .<br>Antidepressants for depression in stage 3-5 chronic kidney disease: a systematic review of pharmacokinetics, efficacy and safety with recommendations by European Renal Best Practice (ERBP). <a href="#">Nephrol Dial Transplant</a> 2012 Oct;27(10): 3736-45. Epub 2012 Aug 1. |
| 2015 | Depression                                         |                                                 | Patients with HIV                                                             | --SSRI, especially fluoxetine<br>--TCA<br>--Less data for testosterone, stimulants, dehydroepiandrosterone | --CBT and cognitive therapy<br>--Collaborative care/stepped care improve depression, HIV health outcomes, costs | Nanni MG, Caruso R, Mitchell AJ, Meggiolaro E, Grassi L. Depression in HIV infected patients: a review. Curr Psychiatry Rep 2015; 17:530.                                                                                                                                                                                                                                                              |
| 2009 | Mental disorders and behavioral problems including | Children, adolescents, young adults (to age 25) | Prevention in family, community, school-based, legal, and health care systems | n/a                                                                                                        | --Prevention programs derived from CBT for anxiety/depression                                                   | O'Connell ME, Boat T, Warner KE., eds. Preventing Mental, Emotional, and Behavioral Disorders Among Young People: Progress and Possibilities. National Research Council and Institute of Medicine of the National Academies. Washington DC:National Academies Press, 2009. <a href="http://www.nap.edu">www.nap.edu</a>                                                                                |

|      |                                                          |                        |                                                                                                                                                                                      |                                                                                                                                                              |                                                                             |                                                                                                                                                                                                                                                                                                                                           |
|------|----------------------------------------------------------|------------------------|--------------------------------------------------------------------------------------------------------------------------------------------------------------------------------------|--------------------------------------------------------------------------------------------------------------------------------------------------------------|-----------------------------------------------------------------------------|-------------------------------------------------------------------------------------------------------------------------------------------------------------------------------------------------------------------------------------------------------------------------------------------------------------------------------------------|
|      | depression and anxiety                                   |                        |                                                                                                                                                                                      |                                                                                                                                                              | --Family intervention for prevention of depression in high risk adolescents |                                                                                                                                                                                                                                                                                                                                           |
| 2007 |                                                          |                        | Review of cognitive behavioral therapy                                                                                                                                               |                                                                                                                                                              | --CBT                                                                       | Rachman, S. The evolution of cognitive behaviour therapy. In Clark, D, Fairburn, CG & Gelder, MG. <i>Science and practice of cognitive behaviour therapy</i> . Oxford: Oxford University Press, 2007: pp. 1–26.                                                                                                                           |
| 2010 | Depression: MDD, adjustment disorder, dysthymia          | Adults                 | Review and meta-analysis; 51 RCTs of antidepressants in physically ill populations                                                                                                   | --TCA and SSRI both more effective than placebo in pooled efficacy analysis of 1674 patients                                                                 | n/a                                                                         | Rayner <a href="#">L</a> , <a href="#">Price A</a> , <a href="#">Evans A</a> , <a href="#">Valsraj K</a> , <a href="#">Higginson IJ</a> , <a href="#">Hotopf M</a> . Antidepressants for depression in physically ill people. <i>Cochrane Database Syst Rev</i> . 2010 Mar 17;(3): CD007503.                                              |
| 2010 | Depression: MDD, adjustment disorder, dysthymic disorder | Adults                 | Review and meta-analysis; 25 RCTs of antidepressants in individuals with “life threatening illness”: cancer, renal failure, COPD, heart failure, HIV Parkinson’s, multiple sclerosis | --TCA and SSRI both more effective than placebo in meta-analysis<br><br>--Mianserin and mirtazapine also more effective than placebo, but with fewer studies | n/a                                                                         | Rayner <a href="#">L</a> , <a href="#">Price A</a> , <a href="#">Evans A</a> , <a href="#">Valsraj K</a> , <a href="#">Hotopf M</a> , <a href="#">Higginson IJ</a> . Antidepressants for the treatment of depression in palliative care: systematic review and meta-analysis. <i>Palliat Med</i> . 2011 Jan;25(1):36-51. Epub 2010 Oct 8. |
| 2014 | Depression                                               | Adults                 | Systematic review and meta-analysis supporting reduction of depressive symptoms by physical activity in patients with mental illness                                                 | n/a                                                                                                                                                          | n/a                                                                         | Rosenbaum S, Tiedemann A, Sherrington C, Curtis J, Ward PB. Physical activity interventions for people with mental illness: a systematic review and meta-analysis. <i>J Clin Psychiatry</i> . 2014 Sep;75(9):964-74.                                                                                                                      |
| 2012 | Anxiety, depression, other psychiatric disorders         | Children & Adolescents | Textbook of pharmacotherapy in pediatric populations                                                                                                                                 | --Reviews principles of clinical psychopharmacology<br><br>--Reviews use of antidepressants in                                                               | n/a                                                                         | Rosenberg DR, Gershon S, eds. <i>Pharmacotherapy of Child and Adolescent Psychiatric Disorders</i> . Third edition. West Sussex: Wiley-Blackwell, 2012.                                                                                                                                                                                   |

|            |                                                  |                                                              |                                                                                   |                                                                    |                                                                  |                                                                                                                                                                                                                                                                                                                                                               |
|------------|--------------------------------------------------|--------------------------------------------------------------|-----------------------------------------------------------------------------------|--------------------------------------------------------------------|------------------------------------------------------------------|---------------------------------------------------------------------------------------------------------------------------------------------------------------------------------------------------------------------------------------------------------------------------------------------------------------------------------------------------------------|
|            |                                                  |                                                              |                                                                                   | children and adolescents                                           |                                                                  |                                                                                                                                                                                                                                                                                                                                                               |
| 2011       | Depression                                       |                                                              | Patients with diabetes                                                            | --SSRI                                                             | --CBT                                                            | Rustad JK, Musselman DL, Nemeroff CB. The relationship of depression and diabetes: pathophysiological and treatment implications. <i>Psychoneuroendocrinology</i> 2011; 36: 1276-1286.                                                                                                                                                                        |
| 2013       | Mood disorders and anxiety                       | Adults                                                       | Patients with HIV                                                                 | n/a                                                                | --CBT reduced symptoms of depression and anxiety                 | Spies G, Asmal L, Seedat S. Cognitive-behavioural interventions for mood and anxiety disorders in HIV: a systematic review. <i>Journal of Affective Disorders</i> 2013; 150:171-180.                                                                                                                                                                          |
| 2008, 2015 | Depression, anxiety, other psychiatric disorders | Adults; chapters focusing on children & adolescents; elderly | Textbook of clinical psychiatry, including patients with comorbid medical illness | --Reviews use and risks of antidepressants, drug-drug interactions | --Reviews psychological interventions including in medically ill | Stern TA, Rosenbaum JF, Fava M, Biederman J, Rauch SL, eds. <i>Massachusetts General Hospital Comprehensive Clinical Psychiatry</i> . Philadelphia: Mosby/Elsevier, 2008.<br><br>Stern TA, Fava M, Wilens T, Rosenbaum JF, eds. <i>Massachusetts General Hospital Comprehensive Clinical Psychiatry</i> , 2 <sup>nd</sup> edition. Elsevier, 2015 (in press). |
| 2005       | Depression                                       | Children and adolescents                                     | Patients with diabetes                                                            | n/a                                                                | --Family interventions                                           | Stewart SM, Rao U, White P. Depression and diabetes in children and adolescents. <i>Current Opinion in Pediatrics</i> 2005;17: 626-631.                                                                                                                                                                                                                       |
| 2012       | Anxiety                                          |                                                              | Patients with cancer                                                              | --SSRIs are preferred                                              | --CBT and/or stress management                                   | Traeger L, Greer JA, Temel JS, Fernandez-Robles C, Pirl WF. Evidence-based treatment of anxiety in patients with cancer. <i>Journal of Clinical Oncology</i> 2012;30: 1197-1205.                                                                                                                                                                              |
| 2013       | Distress, pain                                   | Children and adolescents                                     | Patients undergoing medical procedures using needles                              | n/a                                                                | --Distraction<br><br>--Hypnosis                                  | Uman LS, Birnie KA, Noel M, Parker JA, Chambers CT, McGrath PJ, Kisely SR (2013) Psychological interventions for needle-related procedural pain and distress in children and adolescents. <i>Cochrane Database Syst Rev</i> . 2013 Oct 10;10:CD005179.                                                                                                        |
| 2011       | Anxiety                                          | Adults (age 40+)                                             | Review of 4 studies in individuals with COPD (n=40)                               | --Insufficient evidence                                            | n/a                                                              | <a href="#">Usmani ZA</a> , <a href="#">Carson KV</a> , <a href="#">Cheng JN</a> , <a href="#">Esterman AJ</a> , <a href="#">Smith BJ</a> .<br><br>Pharmacological interventions for the treatment of anxiety disorders in chronic obstructive pulmonary disease. <i>Cochrane</i>                                                                             |

|      |                                                       |                               |                                                                                                |                                                                                                   |                                                                            |                                                                                                                                                                                                                                                                                                            |
|------|-------------------------------------------------------|-------------------------------|------------------------------------------------------------------------------------------------|---------------------------------------------------------------------------------------------------|----------------------------------------------------------------------------|------------------------------------------------------------------------------------------------------------------------------------------------------------------------------------------------------------------------------------------------------------------------------------------------------------|
|      |                                                       |                               |                                                                                                |                                                                                                   |                                                                            | <a href="#">Database Syst Rev.</a> 2011 Nov 9;(11):CD008483.                                                                                                                                                                                                                                               |
| 2010 | Dysthymic disorder or significant depressive symptoms | Adults                        | Patients with diabetes                                                                         | --Pharmacotherapy showed some effects on depression, but the number of subjects was small         | --CBT<br>--Supportive therapy                                              | van der Feltz-Cornelis C, Nuyen J, Stoop C, Chan J, Jacobson AM, Katon W, et al. Effect of interventions for major depressive disorder and significant depressive symptoms in patients with diabetes mellitus: a systematic review and meta-analysis. <i>General Hospital Psychiatry</i> 2010;32: 380-395. |
| 2013 | Depression                                            | Children, adolescents, adults | Patients with diabetes                                                                         | n/a                                                                                               | --CBT                                                                      | Verma R, Balhara Y. Management of depression in diabetes: A review of psycho-social interventions. <i>Journal of Social Health and Diabetes</i> 2013;1: 22-26.                                                                                                                                             |
| 2014 |                                                       |                               | Review of liver injury associated with antidepressants                                         | --Lower risk of liver injury with citalopram, escitalopram, paroxetine, fluvoxamine               | n/a                                                                        | Voican CS, Corruble E, Naveau S, Perlemuter G. Antidepressant-induced liver injury: a review for clinicians. <i>Am J Psychiatry</i> 2014; 171:404-415.                                                                                                                                                     |
| 2013 |                                                       |                               | Review of serotonin syndrome with use of linezolid and SSRIs or other serotonergic medications | --SSRI/linezolid interaction may be severe but concomitant use is not necessarily contraindicated | n/a                                                                        | Woytowish MR, Maynor LM. Clinical relevance of linezolid-associated serotonin toxicity. <i>Ann Pharmacother</i> 2013; 47:388-397.                                                                                                                                                                          |
| 2010 | Depression and anxiety                                |                               | Patients with heart failure and COPD                                                           | n/a                                                                                               | --CBT<br>--Pulmonary rehabilitation reduces symptoms in patients with COPD | Yohannes AM, Willgoss TG, Baldwin RC, Connolly MJ. Depression and anxiety in chronic heart failure and chronic obstructive pulmonary disease: prevalence, relevance, clinical implications and management principles. <i>International Journal of Geriatric Psychiatry</i> 2010;25: 1209-1221.             |

CBT: Cognitive behavioral therapy

CF: Cystic Fibrosis

COPD: Chronic obstructive pulmonary disease



HIV: Human immunodeficiency virus

MAOI: Monoamine oxidase inhibitor

MDD: Major depressive disorder

RCT: Randomized controlled trial

SNRI: Serotonin norepinephrine reuptake inhibitor

SSRI: Selective serotonin reuptake inhibitor

QTc: Corrected QT interval (on electrocardiogram)

TCA: Tricyclic antidepressant

### Comparison of First-Line Medications Recommended to Treat Depression and/or Anxiety in Individuals with CF ages 12-Adulthood

|                                                                                                                                                                  | <b>CITALOPRAM</b>                             | <b>ESCITALOPRAM</b>                            | <b>FLUOXETINE</b>                             | <b>SERTRALINE</b>                                |
|------------------------------------------------------------------------------------------------------------------------------------------------------------------|-----------------------------------------------|------------------------------------------------|-----------------------------------------------|--------------------------------------------------|
| <b>BASIC CHARACTERISTICS</b>                                                                                                                                     |                                               |                                                |                                               |                                                  |
| <b>Neurochemical class</b>                                                                                                                                       | SSRI                                          | SSRI; active <i>S</i> -isomer of citalopram    | SSRI                                          | SSRI                                             |
| <b>Selected trade names</b>                                                                                                                                      | --Akarin<br>--Celexa<br>--Cipramil            | --Cipralext<br>--Lexapro<br>--Seroplex         | --Adofen<br>--Fluctine<br>--Prozac            | --Gladem<br>--Lustral<br>--Zoloft                |
|                                                                                                                                                                  | <b>CITALOPRAM</b>                             | <b>ESCITALOPRAM</b>                            | <b>FLUOXETINE</b>                             | <b>SERTRALINE</b>                                |
| <b>DOSING</b>                                                                                                                                                    |                                               |                                                |                                               |                                                  |
| <b>Reduced starting dose</b><br><br>--For pediatric or medically complex individuals                                                                             | Start at 5-10 mg/day                          | Start at 2.5-5 mg/day                          | Start at 5-10 mg/day                          | Start at 12.5-25 mg/day                          |
| <b>Dose increase</b><br><br>--Assess clinical response, considering repeat GAD-7 and/or PHQ-9 and functional improvement<br><br>--Assess adherence to medication | Increase by 5-10 mg every 1-4 weeks if needed | Increase by 2.5-5 mg every 1-4 weeks if needed | Increase by 5-10 mg every 1-4 weeks if needed | Increase by 12.5-25 mg every 1-4 weeks if needed |

|                                                                                                                                                                                                                                                                                   |                 |                 |                 |                  |
|-----------------------------------------------------------------------------------------------------------------------------------------------------------------------------------------------------------------------------------------------------------------------------------|-----------------|-----------------|-----------------|------------------|
| <p>--If symptoms persist and side effects are tolerable, consider dose increase</p>                                                                                                                                                                                               |                 |                 |                 |                  |
| <p><b>Typical target dose</b></p> <p>--To minimize the risk of relapse, consider continuing SSRI for one year following an episode of treatment before tapering gradually</p> <p>--Patients with recurrent symptoms may need longer-term treatment</p>                            | 20-40 mg/day    | 10-20 mg/day    | 20-60 mg/day    | 50-200 mg/day    |
| <p><b>Elevated dose (off-label)</b></p> <p>--High doses may be required in cases of partial response, poor absorption, enhanced hepatic metabolism, CYP genetic polymorphism, drug-drug interaction</p> <p>--Consider change in SSRI or referral for specialized consultation</p> | Up to 80 mg/day | Up to 40 mg/day | Up to 80 mg/day | Up to 250 mg/day |

|                                                                                                                                                                                                                 |                                                                              |                                                                              |                                                                                                                                                                                  |                                                                                                    |
|-----------------------------------------------------------------------------------------------------------------------------------------------------------------------------------------------------------------|------------------------------------------------------------------------------|------------------------------------------------------------------------------|----------------------------------------------------------------------------------------------------------------------------------------------------------------------------------|----------------------------------------------------------------------------------------------------|
| <b>Dose adjustment for renal impairment</b>                                                                                                                                                                     | none                                                                         | none                                                                         | none                                                                                                                                                                             | Consider reducing maximum dose in severe renal impairment                                          |
| <b>Dose adjustment for hepatic impairment</b>                                                                                                                                                                   | Maximum 20 mg/day                                                            | Maximum 10 mg/day                                                            | Reduce dose (50% reduction in severe hepatic impairment)                                                                                                                         | Reduce dose                                                                                        |
| <b>TDM target blood level (ng/ml)</b><br><br>--TDM is not routinely used for SSRIs<br><br>--Consider TDM when elevated doses are required, or drug-drug interactions or CYP genetic polymorphisms are suspected | 50-110                                                                       | 15-80                                                                        | 120-500                                                                                                                                                                          | 10-150                                                                                             |
|                                                                                                                                                                                                                 | <b>CITALOPRAM</b>                                                            | <b>ESCITALOPRAM</b>                                                          | <b>FLUOXETINE</b>                                                                                                                                                                | <b>SERTRALINE</b>                                                                                  |
| <b>DRUG-DRUG INTERACTIONS</b>                                                                                                                                                                                   |                                                                              |                                                                              |                                                                                                                                                                                  |                                                                                                    |
| <b>CYP metabolism of SSRI</b>                                                                                                                                                                                   | Major substrates:<br><br>2C19<br><br>3A4<br><br>Minor substrates:<br><br>2D6 | Major substrates:<br><br>2C19<br><br>Minor substrates:<br><br>3A4<br><br>2D6 | Major substrates:<br><br>2C9<br><br>2D6*<br><br>*metabolite norfluoxetine is exclusive substrate of CYP2D6, increasing clinical significance<br><br>Minor substrates:<br><br>1A2 | Major substrates:<br><br>2C19<br><br>3A4<br><br>Minor substrates:<br><br>2B6<br><br>2C9<br><br>2D6 |

|                                  |                                       |                                       |                                                                                                              |                                                                           |
|----------------------------------|---------------------------------------|---------------------------------------|--------------------------------------------------------------------------------------------------------------|---------------------------------------------------------------------------|
|                                  |                                       |                                       | 2B6<br>2C19<br>3A4                                                                                           |                                                                           |
| <b>Inhibition of CYP by SSRI</b> | Weak to moderate inhibitor of:<br>2D6 | Weak to moderate inhibitor of:<br>2D6 | Strong inhibitor of:<br>2D6<br><br>Weak to moderate inhibitor of:<br>1A2<br>2B6<br>2C9<br>2C19<br>2D6<br>3A4 | Weak to moderate inhibitor of:<br>1A2<br>2B6<br>2C9<br>2C19<br>2D6<br>3A4 |

|                                                                                                                                                         |                  |                                                    |                  |                             |
|---------------------------------------------------------------------------------------------------------------------------------------------------------|------------------|----------------------------------------------------|------------------|-----------------------------|
| <b>Selected CYP-mediated drug-drug interactions:</b><br><br>Medications commonly used in CF that may require dose reduction of SSRI or of CF medication | 2C19 inhibitors: | 2C19 inhibitors:                                   | 2C9 inhibitors:  | 2C19 inhibitors:            |
|                                                                                                                                                         | Cimetidine       | Cimetidine                                         | Fluconazole      | Cimetidine                  |
|                                                                                                                                                         | Fluconazole      | Fluconazole                                        | Miconazole       | Fluconazole                 |
|                                                                                                                                                         | Esomeprazole     | Esomeprazole                                       |                  | Esomeprazole                |
|                                                                                                                                                         | Omeprazole       | Omeprazole                                         | 2D6 inhibitors:  | Omeprazole                  |
|                                                                                                                                                         | Voriconazole     | Voriconazole                                       | Cimetidine       | Voriconazole                |
|                                                                                                                                                         |                  |                                                    | Methadone        |                             |
|                                                                                                                                                         | 3A4 inhibitors:  | 3A4 inhibitors:                                    | Metoclopramide   | 3A4 inhibitors:             |
|                                                                                                                                                         | Clarithromycin   | Clarithromycin                                     |                  | Clarithromycin Itraconazole |
|                                                                                                                                                         | Itraconazole     | Itraconazole                                       | 2D6 substrates:  | Ketoconazole                |
|                                                                                                                                                         | Ketoconazole     | Ketoconazole                                       | Dextromethorphan | Voriconazole                |
|                                                                                                                                                         | Voriconazole     | Voriconazole                                       | Hydroxycodone    | Posaconazole                |
|                                                                                                                                                         | Posaconazole     | Posaconazole                                       | Ondansetron      | Fluconazole                 |
|                                                                                                                                                         | Fluconazole      | Fluconazole                                        | Morphine         | Erythromycin                |
|                                                                                                                                                         | Erythromycin     | Erythromycin                                       | Codeine*         | Ivacaftor (weak)            |
| Ivacaftor (weak)                                                                                                                                        | Ivacaftor (weak) | Tramadol*                                          |                  |                             |
|                                                                                                                                                         |                  | *analgesic effect may be reduced by 2D6 inhibition | 3A4 inducers:    |                             |
| 3A4 inducers:                                                                                                                                           | 3A4 inducers:    |                                                    | Lumacaftor       |                             |
| Lumacaftor                                                                                                                                              | Lumacaftor       |                                                    | Rifampin         |                             |
| Rifampin                                                                                                                                                | Rifampin         |                                                    |                  |                             |

|                                                                                                                                                                                                                                                                                                                                                                                                                                                                                      |                                                                                                                                                                                                                                                          |                             |             |                             |
|--------------------------------------------------------------------------------------------------------------------------------------------------------------------------------------------------------------------------------------------------------------------------------------------------------------------------------------------------------------------------------------------------------------------------------------------------------------------------------------|----------------------------------------------------------------------------------------------------------------------------------------------------------------------------------------------------------------------------------------------------------|-----------------------------|-------------|-----------------------------|
|                                                                                                                                                                                                                                                                                                                                                                                                                                                                                      | 3A4 substrate:<br>Ivacaftor                                                                                                                                                                                                                              | 3A4 substrate:<br>Ivacaftor |             | 3A4 substrate:<br>Ivacaftor |
| <p><b>QTc prolongation</b></p> <p>--Modest dose-dependent increases in QTc are unlikely to be clinically significant unless QTc is high (&gt;500 ms)</p> <p>--May consider EKG monitoring when used with other medications that prolong QTc:</p> <ul style="list-style-type: none"> <li>• Antifungals: fluconazole, ketoconazole</li> <li>• Macrolides: erythromycin, clarithromycin, azithromycin</li> <li>• Methadone</li> <li>• Quinolones: levofloxacin, moxifloxacin</li> </ul> | <p>Carries FDA warning:</p> <p><a href="http://www.fda.gov/Drugs/DrugSafety/ucm297391.htm">http://www.fda.gov/Drugs/DrugSafety/ucm297391.htm</a></p> <p>--Discontinue use if QTc&gt;500 ms persistently</p> <p>--Correct hypokalemia, hypomagnesemia</p> | Less likely                 | Less likely | Less likely                 |

|                                                                                                                                                                                                                                                                                                                                                                                |                                                                                                                                                                                                                                                                                                                                                                                                                                                                                                                                                                                                                                                               |           |           |           |
|--------------------------------------------------------------------------------------------------------------------------------------------------------------------------------------------------------------------------------------------------------------------------------------------------------------------------------------------------------------------------------|---------------------------------------------------------------------------------------------------------------------------------------------------------------------------------------------------------------------------------------------------------------------------------------------------------------------------------------------------------------------------------------------------------------------------------------------------------------------------------------------------------------------------------------------------------------------------------------------------------------------------------------------------------------|-----------|-----------|-----------|
| <p><b>Serotonin syndrome</b></p> <p>--Potentially fatal syndrome includes change in mental status; autonomic instability (sweating, tachycardia, fever); tremor, myoclonus, hyperreflexia; abdominal pain and diarrhea</p> <p>--Relative contraindication of SSRI use with linezolid; when alternatives are unavailable, use with informed consent and clinical monitoring</p> | linezolid                                                                                                                                                                                                                                                                                                                                                                                                                                                                                                                                                                                                                                                     | linezolid | linezolid | linezolid |
|                                                                                                                                                                                                                                                                                                                                                                                |                                                                                                                                                                                                                                                                                                                                                                                                                                                                                                                                                                                                                                                               |           |           |           |
| <b>ADVERSE EFFECTS</b>                                                                                                                                                                                                                                                                                                                                                         |                                                                                                                                                                                                                                                                                                                                                                                                                                                                                                                                                                                                                                                               |           |           |           |
| <b>Common SSRI side effects</b>                                                                                                                                                                                                                                                                                                                                                | <p>--Nausea, diarrhea, sexual dysfunction, insomnia, restlessness, and headache may occur with any SSRI</p> <p>--May improve with time, slower dose titration, dose reduction, or change in medication</p> <p>--Insufficient evidence exists regarding effects of SSRIs in CF on bone density, hemoptysis, or weight gain</p>                                                                                                                                                                                                                                                                                                                                 |           |           |           |
| <b>Suicidal thoughts and/or behaviors</b>                                                                                                                                                                                                                                                                                                                                      | <p>--Depression and anxiety can themselves be associated with suicidal thoughts and/or behavior</p> <p>--Concerns have been raised regarding increased risk of suicidal thoughts and/or behavior with the use of antidepressant medications, particularly when starting medication in pediatric and young adult patients</p> <p>--The risk/benefit ratio remains in favor of using SSRIs when clinically appropriate</p> <p>--Regardless of treatment modality, good clinical practice supports ongoing surveillance of suicidal thoughts in order to properly intervene, particularly at times of higher stress or when initiating or changing treatment</p> |           |           |           |
| <b>SSRI discontinuation syndrome</b>                                                                                                                                                                                                                                                                                                                                           | <p>--When discontinuing an SSRI, taper down gradually whenever possible to avoid discontinuation symptoms</p> <p>--May include nausea, headache, dizziness, paresthesias, and insomnia</p>                                                                                                                                                                                                                                                                                                                                                                                                                                                                    |           |           |           |

|  |                                                                                            |
|--|--------------------------------------------------------------------------------------------|
|  | --Fluoxetine is least likely to cause discontinuation syndrome due to its longer half-life |
|--|--------------------------------------------------------------------------------------------|

CF: Cystic fibrosis

CYP: Cytochrome P450 isoenzyme

EKG: Electrocardiogram

GAD-7: Generalized Anxiety Disorder-7 (anxiety rating scale)

FDA: United States Food and Drug Administration

PHQ-9: Patient Health Questionnaire-9 (depression rating scale)

SSRI: Selective serotonin reuptake inhibitor

TDM: Therapeutic drug monitoring

QTc: Corrected QT interval on EKG
