# Supplementary material for: International Committee on Mental Health in Cystic Fibrosis: Cystic Fibrosis Foundation and European Cystic Fibrosis Society consensus statements for screening and treating depression and anxiety
Source: HighWire-hosted journal article supplement (doi:10.1136/thoraxjnl-2015-207488), 2015-10-09
Supplement: thoraxjnl-2015-207488supp_appendixE.pdf [file thoraxjnl-2015-207488supp_appendixE.pdf]

## Appendix E: Screening Measures

Table 1: Depression Screening Measures

| Depression Screening Measures                                                         |                                                                                   |                                                                    |                      |                        |                                                                         |                                  |                             |
|---------------------------------------------------------------------------------------|-----------------------------------------------------------------------------------|--------------------------------------------------------------------|----------------------|------------------------|-------------------------------------------------------------------------|----------------------------------|-----------------------------|
| Tool                                                                                  | Description                                                                       | # of Items/Format                                                  | Ages                 | Time                   | Psychometric Properties                                                 | Languages/Cultural Consideration | Cost                        |
| <b>BDI-II (Beck Depression Inventory)<sup>1-2</sup></b>                               | Measures symptoms of depression                                                   | 21 items<br>Self-administered or verbally by trained administrator | 13+                  | 5 min                  | Sensitivity: 84%<br>Specificity: 81%<br>Coefficient alpha: .92          | English, Spanish                 | \$125/kit                   |
| <b>BDI-FS (Beck Depression Inventory-Fastscreen for Medical Patients)<sup>3</sup></b> | Screens for depression, while omitting items that may be due to medical condition | 7 items                                                            | 13+                  | <5 min                 | Sensitivity: 91%<br>Specificity: 91%<br>Cronbach's alpha: .84           | English                          | \$99/kit                    |
| <b>Beck Hopelessness Scale<sup>4-6</sup></b>                                          | Measures negative attitudes about the future                                      | 20 true/false                                                      | 12 to 22             | 5-10 min               | Reliability: 0.93<br>Cronbach's alpha: 0.92 <sup>4</sup>                | English<br>Finnish<br>Spanish    | \$125/kit                   |
|                                                                                       |                                                                                   |                                                                    | 17 to 25 in Pakistan |                        | Cronbach's alpha: 0.81 <sup>5</sup>                                     | Urdu                             |                             |
| <b>BYI (Beck Youth Inventories)<sup>7,8</sup></b>                                     | Screens for depression, anxiety, anger, disruptive behavior, and self-concept     | 5 separate 20-item self-report inventories                         | 7 to 18              | 5 min/<br>inventory    | Cronbach's alpha: 0.83 to 0.94<br>Test-retest reliability: 0.61 to 0.87 | English                          | \$265/kit or \$55/inventory |
| <b>CDI-2 (Child Depression Inventory)<sup>9-12</sup></b>                              | Measures symptoms of depression                                                   | Parent: 17 items<br>Teacher: 12 items<br>Youth: 28 items           | 7 to 17              | 5-10 min (youth items) | Cronbach's alpha: 0.71 to 0.89<br>test-retest range 0.74 to 0.83        | English, Spanish                 | \$289/kit                   |

|                                                                                       |                                                                                      |                        |                            |           |                                                                              |                              |                      |
|---------------------------------------------------------------------------------------|--------------------------------------------------------------------------------------|------------------------|----------------------------|-----------|------------------------------------------------------------------------------|------------------------------|----------------------|
| <b>CDI 2 Short</b> <sup>13</sup>                                                      | Short version of CDI 2                                                               | 10 items               | 7 to 17                    | 5 min     | Sensitivity: 93%<br>Specificity: 71%                                         | English<br>Spanish<br>German | \$55/short version   |
| <b>CDRS-R (Children's Depression Rating Scale- Revised)</b> <sup>14</sup>             | Semi structured interview for depression                                             | 17 items               | 6 to 17                    | 15-20 min | Cronbach's alpha:<br>Initial screening: 0.79<br>Baseline: 0.74<br>Exit: 0.92 | English                      | \$107/kit            |
| <b>CES-D (Center for Epidemiological Studies - Depression Scale)</b> <sup>15-20</sup> | Screens for depression, modified version for children and adolescents                | 20 items               | 6 to 17                    | 5-10 min  | Cronbach's alpha: 0.89                                                       | English<br>Spanish           | Public domain        |
|                                                                                       |                                                                                      | 12 items short version | 7th, 9th, 10th, 12th grade |           | Cronbach's alpha: 0.85                                                       |                              |                      |
| <b>Columbia Depression Scale</b> <sup>21</sup>                                        | Depression stem questions from the Diagnostic Interview Schedule for Children (DISC) | 22 yes/no items        | 11+                        | <5        | Cronbach's alpha: 0.87                                                       | English                      | Free with permission |

|                                                                      |                                                                                                                |                                                        |                                        |          |                                                                                                                                                                                                                                                                                                                                |                                                                           |                      |
|----------------------------------------------------------------------|----------------------------------------------------------------------------------------------------------------|--------------------------------------------------------|----------------------------------------|----------|--------------------------------------------------------------------------------------------------------------------------------------------------------------------------------------------------------------------------------------------------------------------------------------------------------------------------------|---------------------------------------------------------------------------|----------------------|
| <b>HADS (Hospital Anxiety and Depression Scale)</b> <sup>22-23</sup> | Brief assessment of anxiety and depression in medical populations.                                             | 14 items (7 anxiety, 7 depression)                     | 13+                                    | 2-5 min  | Cronbach's alpha: 0.71 (anxiety)<br>0.76 (depression)<br>Significant relationship between acceptance (Illness Cognition Questionnaire) and depressive symptoms                                                                                                                                                                 | English, Arabic, Dutch, French, German, Hebrew, Swedish, Italian, Spanish | Free                 |
| <b>KADS (Kutcher Adolescent Depression Scale)</b> <sup>24-25</sup>   | Measures symptoms of depression                                                                                | 6, 11, or 16 items                                     | 12 to 17                               | 5 min    | Sensitivity: 92%<br>Specificity: 71%                                                                                                                                                                                                                                                                                           | English                                                                   | Free with permission |
| <b>MFQ (Mood and Feeling Questionnaire)</b> <sup>26-27</sup>         | Measures symptoms of depression, available as child self-report, parent report on child, and adult self-report | Youth: 33 items<br>Parent: 34 items<br>Adult: 33 items | 7+ research subjects & clinic patients | 5-10 min | <div> MFQ-C<br/> Cronbach's alpha: 0.95<br/> Test-retest: .80; AUC: .85<br/> Optimal cut point: 29<br/> PPV: 21%<br/> Sensitivity: 68%<br/> Specificity: 88% </div> <div> MFQ-P:<br/> Cronbach's alpha: .96<br/> Test-retest: .80;<br/> Optimal cut point: 27<br/> PPV: 23%<br/> Sensitivity: 61%<br/> Specificity: 85% </div> | English<br>Norwegian                                                      | Free                 |

|                                                    |                                                 |                                                        |                                                                                                   |       |                                                                                                                                                                               |                                  |                      |
|----------------------------------------------------|-------------------------------------------------|--------------------------------------------------------|---------------------------------------------------------------------------------------------------|-------|-------------------------------------------------------------------------------------------------------------------------------------------------------------------------------|----------------------------------|----------------------|
| <b>MFQ - Short Version (SMFQ)</b> <sup>28-30</sup> | Measures symptoms of depression                 | Youth: 13 items<br>Parent: 13 items<br>Adult: 13 items | 7+                                                                                                | 5 min | Child score AUC: 0.73<br>Parent score AUC: 0.74<br>Combined child + parent score: AUC =0.86<br>At cut point of 10:<br>Sensitivity: 76%<br>Specificity: 78%                    | English                          | Free                 |
| <b>PHQ-9</b> <sup>31-34</sup>                      | Measures symptoms of depression and suicidality | 9 plus severity items                                  | Adolescent                                                                                        | 5 min | Cronbach's alpha: 0.79-.89<br>Overall 88% sensitivity and 88% specificity                                                                                                     | English + over 30 more languages | Free with permission |
|                                                    |                                                 |                                                        | Newly medically admitted in- and outpatients aged 13-16 in Pediatric Hospitals in Munich, Germany |       | Dimensional algorithm:<br>Optimal cut point score of 8 or greater<br>Cronbach's alpha: 0.82<br>Sensitivity: 90%<br>Specificity: 86.5%<br>PPV: 48.6%; NPV: 98.4%<br>AUC= 93.2% | German                           |                      |
|                                                    |                                                 |                                                        | 13 to 17                                                                                          |       | Optimal cut point score of 11 or greater<br>Sensitivity: 89.5%<br>Specificity: 77.5%<br>PPV: 15.2%; NPV: 99.4%<br>AOC: 0.88                                                   | English                          |                      |

|                                                                         |                                                      |         |                                                                                                |        |                                                                                                                       |                                       |      |
|-------------------------------------------------------------------------|------------------------------------------------------|---------|------------------------------------------------------------------------------------------------|--------|-----------------------------------------------------------------------------------------------------------------------|---------------------------------------|------|
| <b>PHQ-A<br/>Depression<br/>Screen</b> <sup>35-36</sup>                 | Abbreviated screen<br>specifically for<br>depression | 9 items | 12 to 18                                                                                       | <5 min | Sensitivity: 87.1%<br>Specificity: 79.7%<br>PPV: 39.7%<br>NPV: 97.58%<br>AOC: .939<br>Cronbach's alpha: .835          | Available in<br>multiple<br>languages | Free |
| <b>PHQ-2 (Patient<br/>Health<br/>Questionnaire<br/>2)</b> <sup>37</sup> | First items of PHQ-9                                 | 2 items | 13-16 year<br>old in- and<br>outpatients<br>in pediatric<br>hospitals in<br>Munich,<br>Germany | <5 min | Optimal cut point score<br>of 2 or<br>greater.Sensitivity:<br>85%Specificity:<br>79.4%PPV: 37%NPV:<br>97.4%AUC: 87.2% | German                                | Free |
|                                                                         |                                                      |         | 13 to 17                                                                                       |        | Optimal cut point score<br>of 2 or greater.<br>Sensitivity: 74%<br>Specificity: 75%<br>AOC: 0.84                      | English                               |      |

**Table 2: Anxiety Screening Measures**

| Anxiety Screening Measures                                                                  |                                                                                                     |                   |                     |        |                                                                                                               |                                                                        |           |
|---------------------------------------------------------------------------------------------|-----------------------------------------------------------------------------------------------------|-------------------|---------------------|--------|---------------------------------------------------------------------------------------------------------------|------------------------------------------------------------------------|-----------|
| Tool                                                                                        | Description                                                                                         | # of Items/Format | Ages                | Time   | Psychometric Properties                                                                                       | Languages                                                              | Cost      |
| <b>MASC (Multidimensional Anxiety Scale for Children)</b> <sup>38-39</sup>                  | Broad dimensions of anxiety-physical symptoms, harm avoidance, social anxiety, and separation/panic | 39 items          | 8 to 19             | 15 min | Gender: girls scored higher across all scale than boys.                                                       | English, Taiwanese                                                     | \$189/kit |
|                                                                                             |                                                                                                     |                   | 8 to 13 in Sydney   |        | Cronbach's alpha: .89 (child)<br>Cronbach's alpha: .90 (parent)<br>Parent Child concordance: range .20 to .36 | English                                                                |           |
| <b>GAD-7 (Generalized Anxiety Disorder Scale)</b> <sup>40</sup>                             | Self-report anxiety scale                                                                           | 7 items           | Adolescent to adult | <5 min | Cronbach's alpha: .92<br>Test-retest reliability: intraclass correlation: .83                                 | English + over 30 more languages                                       | Free      |
| <b>SCARED (Self-Report for Childhood Anxiety Related Emotional Disorders)</b> <sup>41</sup> | Child and parent self-report for childhood anxiety                                                  | 41 items          | 8 to 18             | 10 min | Coefficient alpha: 0.90                                                                                       | English, Arabic, Chinese, French, German, Italian, Portuguese, Spanish | Free      |

|                                                                            |                                                |          |                     |        |                                                                                             |                                                                       |      |
|----------------------------------------------------------------------------|------------------------------------------------|----------|---------------------|--------|---------------------------------------------------------------------------------------------|-----------------------------------------------------------------------|------|
| <b>Spence Children's Anxiety Scale</b> <sup>42-44</sup>                    | Self-report that assess six domains of anxiety | 44 items | 8 to 12             | 10 min | Coefficient alpha: 0.9 to 0.92<br>Test-retest 0.60 to 0.63                                  | Available in 22 languages                                             | Free |
| <b>Penn State Worry Questionnaire (PSWQ)</b> <sup>46</sup>                 | Self-report worry severity questionnaire       | 16 items | Adolescent to adult | <5 min | Cronbach's alpha: 0.95<br>Test-retest reliability: $r = 0.92$<br>Internal consistency = .91 | English, Korean, French, Dutch, Chinese, German, Greek, Italian, Thai | Free |
| <b>Penn State Worry Questionnaire – Children (PSWQ-C)</b> <sup>47-48</sup> | Self-report worry severity questionnaire       | 14 items | 6 to 18             | 5 min  | Test-retest reliability: 0.92<br>Internal Consistency: 0.89                                 | English, Korean, French, Dutch, Chinese, German, Greek, Italian, Thai | Free |

AAP, American Academy of Pediatrics; MCHB, Maternal and Child Health Bureau; NA, not applicable; PPV, positive predictive value; NPV, negative predictive value; ROC, receiver operator curve; *DSM-IV*, *Diagnostic and Statistical Manual of Mental Disorders, Fourth Edition*; ADHD, attention-deficit/hyperactivity disorder; ODD, oppositional-defiant disorder; CD, conduct disorder; OCD, obsessive-compulsive disorder; PTSD, post-traumatic stress disorder; *DSM-III-R*, *Diagnostic and Statistical Manual of Mental Disorders, Third Edition, Revised*; *ICD-10*, *International Classification of Diseases, 10th Edition*.

1. Beck AT, Steer RA, Carbin MG. Psychometric properties of the Beck Depression Inventory: twenty-five years of evaluation. *Clin Psychol Rev* 1988;8:77-100.
2. Whisman MA, Perez JE, Ramel W. Factor structure of the Beck Depression Inventory-Second Edition (BDI-II) in a student sample. *J Clin Psychol* 2000;56:545-551.
3. Poole H, Bramwell R, & Murphy P. The utility of the Beck Depression Inventory Fast Screen (BDI-FS) in a pain clinic population. *Eur J Pain* 2009;13:865-869.
4. Grano N, Karjalainen M, Edlund V, et al. Changes in depression, anxiety and hopelessness symptoms during family- and community-oriented intervention for help-seeking adolescents and adolescents at risk of psychosis. *Nord J Psychiatry* 2013;68:93-99.
5. Ayub N. Measuring hopelessness and life orientation in Pakistani adolescents. *Crisis* 2009;30:153-160.
6. Beck AT, Weissman A, Lester D, et al. The measurement of pessimism: the hopelessness scale. *J Consult Clin Psychol* 1974;42:861-865.

7. Steer RA, Kumar G, Beck JS, et al. Evidence for the construct validities of the beck youth inventories with child psychiatric outpatients. *Psychol Rep* 2001;89:559-565.
8. Bregnballe VM, Thastum M, Schiotz PO. Psychosocial problems in children with cystic fibrosis. *Acta Pædiatr* 2006;96:58-61.
9. Smucker MR, Craighead WE, Craighead LW, et al. Normative and reliability data for the children's depression inventory. *J Abnorm Child Psychol* 1986;14:25-39.
10. Traube D, Dukay V, Kaaya S, et al. Cross-cultural adaptation of the child depression inventory for use in Tanzania with children affected by HIV. *Vulnerable Child Youth Stud* 2010;5:174-187.
11. Hood KK, Huestis S, Maher A, et al. Depressive symptoms in children and adolescents with type 1 diabetes. *Diabetes Care* 2006;29:1389-1391.
12. Davanzo, P, Kerwin L, Nikore V, et al. Spanish translation and reliability testing of the child depression inventory. *Child Psychiatry Hum Dev* 2004;35:75-92.
13. Allgaier AK, Fruhe B, Pietsch K, et al. Is the children's depression inventory short version a valid screening tool in pediatric care? A comparison to its full-length version. *J Psychosom Res* 2012;73:369-374.
14. Mayes TL, Bernstein IH, Haley CL, et al. Psychometric properties of the children's depression rating scale—revised in adolescents. *J Child Adol Psychop* 2010;20:513-516.
15. Faulstich ME, Carey MP, Ruggiero L, et al. Assessment of depression in childhood and adolescence: an evaluation of the Center for Epidemiological Studies Depression Scale for Children (CES-DC). *Am J Psychiatry* 1986;143:1024-1027.
16. Doerfler LA, Felner RD, Rowlinson RT, et al. Depression in children and adolescents: a comparative analysis of the utility and construct validity of two assessment measures. *J Consult Clin Psychol* 1988;56:769-772.
17. Garrison CZ, Addy CL, Jackson KL, et al. The CES-D as a screen for depression and other psychiatric disorders in adolescents. *J Am Acad Child Adolesc Psychiatry* 1991;30:636-641.
18. Faulstich ME, Moore JR, Carey MP, et al. Prevalence of DSM-III conduct and adjustment disorders for adolescent psychiatric inpatients. *Adolescence* 1986;21:333-337.
19. Weissman MM, Orvaschel H, Padian N. Children's symptom and social functioning self-report scales: comparison of mothers' and children's reports. *J Nerv Ment Dis* 1980;168:736-740.
20. Poulin C, Hand D, & Boudreau B., Validity of a 12-item version of the CES-D used in the national longitudinal study of children and youth. *Chronic Dis Can*, 2005; 26(2):65-72.
21. Zuckerbrot RA, Maxon L, Pagar D, Davies M, Fisher PW, & Shaffer, D. Adolescent depression screening in primary care: feasibility and acceptability. *Pediatrics*, 2007; 119:101-108.
22. Crawford JR, Henry JD, Crombie, C, Tayler EP. Brief report: Normative data for the HADS from a large non-clinical sample. *Br J Clin Psychol*, 2001;40:429-434.
23. Besier T, Bron A, Henrich G, et al. Anxiety, depression, and life satisfaction in parents caring for children with cystic fibrosis. *Pediatr Pulmonol*, 2011;46:672-682.
24. Kutcher, SP & Chehil S. Suicide risk management: A manual for health professionals. Melbourne, VIC: Wiley-Blackwell, 2007.

25. LeBlanc JC, Almudevar A, Brooks SJ, & Kutcher S. Screening for adolescent depression: Comparison of the Kutcher Adolescent Depression Scale with the Beck Depression Inventory. *J Child Adol Psychop*, 2002;12(2):113-126.
26. Stevanovic D, Jancic J, Topalovic M, & Tadic I. Agreement between children and parents when reporting anxiety and depressive symptoms in pediatric epilepsy. *Epilepsy Behav*, 2012;25:141-144.
27. Burleson Daviss W, Birmaher B, Melhelm NA, et al. Criterion validity of the Mood and Feelings Questionnaire for depressive episodes in clinic and non-clinic subjects. *J Child Psychol Psychiatry*, 2006;47(9):927-934.
28. Messer SC, Angold A, & Costello EJ. Development of a short questionnaire for use in epidemiological studies of depression in children and adolescents: factor composition and structure across development. *Int J Methods Psychiatr Res*, 1995;5:251-262.
29. Angold A, Costello, Interviewer:, Messer SC, et al. Development of a short questionnaire for use in epidemiological studies of depression in children and adolescents. *Int J Methods Psychiatr Res*, 1995;5:237-249.
30. Rhew IC, Simpson K, Tracy M, et al. Criterion validity of the Short Mood and Feelings Questionnaire and one –and two-item depression screens in young adolescents. *Child Adolesc Ment Health*, 2010;4(8):1-11.
31. Richardson LP, McCauley E, Grossman D, et al. Evaluation of the Patient Health Questionnaire-9 Item for Detecting Major Depression Among Adolescents. *Pediatrics*, 2010;126(6): 1117-1123.
32. Allgaier A, Pietsch K, Fruhe B, et al. Screening for depression in adolescents: validity of the patient health questionnaire in pediatric care. *Depress Anxiety*, 2012;29(10):906-913.
33. Huang FY, Chung H, Kroenke K, Delucchi KL, & Spitzer RL. Using the patient health questionnaire-9 to measure depression among racially and ethnically diverse primary care patients. *J Gen Intern Med*, 2006;21(6):547-552.
34. Kroenke K, Spitzer RL, Williams JBW. The PHQ-9: Validity of a brief depression severity measure. *J Gen Intern Med*, 2001;16:606-613.
35. US Preventive Services Task Force. Screening and treatment for major depressive disorder in children and adolescents: US preventive services task force recommendation statement. *Pediatrics* 2009;123:1223–1228.
36. Ganguly S, Samanta M, Roy P, et al. Patient health questionnaire-9 as an effective tool for screening of depression among Indian adolescents. *J Adolesc Health*, 2013;52:546-551.
37. Richardson LP, Rockhill C, Russo JE, et al. Evaluation of the PHQ-2 as a brief screen for detecting major depression among adolescents. *Pediatrics*, 2010;125(5):1097-1103.
38. Yen CF, Ko CH, Wu YY, et al. Normative data on anxiety symptoms on the multidimensional anxiety scale for children in Taiwanese children and adolescents: Differences in sex, age, and residence and comparison with an American sample. *Child Psychiatry Hum Dev*, 2010;41:614-623.
39. Baldwin JS, & Dadds MR. Reliability and validity of parent and child versions of the multidimensional anxiety scale for children in community samples. *J. Am. Acad. Child Adolesc. Psychiatry*, 2007;46(2):252-260.
40. Spitzer RL, Kroenke, K., Williams, JBW, Lowe, B. A brief measure for assessing generalized anxiety disorder: The GAD-7. *Arch Intern Med*, 2006;166:1092-1097.
41. Su L, Wang K, Fan F, et al. Reliability and validity of the screen for child anxiety related emotional disorders (SCARED) in Chinese children. *J Anxiety Disord*, 2008;22(4):612-621.

42. Spence SH, Barrett PM, & Turner CM. Psychometric properties of the spence children's anxiety scale with young adolescents. *J Anxiety Disord*, 2003;17(6):605-625.
43. Tsocheva I, Sasagawa S, Georgiou G, & Essau C. Psychometric properties of the Bulgarian translation of the Spence Children's anxiety scale. *J Psychol Abnorm Child*, 2013;1(1): 1-6.
44. Essau C, Sasagawa S, Anastassiou-Hadjicharalambous X, et al. Psychometric properties of the Spence Child Anxiety Scale with adolescents from five European countries. *J Anxiety Disord*, 2011;25:19-27.
45. Meyer TJ, Miller ML, Metzger RL, et al. Development and validation of the Penn State Worry Questionnaire. *Behav Res Ther*, 1990;28(6):487-95.
46. Chorpita BF, Tracey SA, Brown TA, et al. Assessment of worry in children and adolescents: an adaptation of the Penn State Worry questionnaire. *Behav Res Ther* 1997;35:569-581.
47. Muris P, Meesters C, Gobel M. Reliability, validity, and normative data of the penn state worry questionnaire in 8-12-yr-old children. *J Behav Ther Exp Psychiatry* 2001;32:63-72.
